# Supplementary material for: The use of supplementary immunisation activities to improve uptake of current and future vaccines in low-income and middle-income countries: a systematic review protocol
Source: PubMed Central journal article supplement — BMJ Open. 2014 Feb 18;4(2):e004429. doi: 10.1136/bmjopen-2013-004429 (PMC3932000; doi:10.1136/bmjopen-2013-004429), 2014-02-18
Supplement: bmjopen-2013-004429.draft_revisions.pdf [file bmjopen-2013-004429.draft_revisions.pdf]

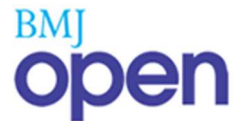

**The use of supplementary immunisation activities to improve uptake of current and future vaccines in low-income and middle-income countries: a systematic review protocol**

|                                 |                                                                                                                                                                                                                                                                                                                                                                                                                                                                                                                                                                                                                                                                                                    |
|---------------------------------|----------------------------------------------------------------------------------------------------------------------------------------------------------------------------------------------------------------------------------------------------------------------------------------------------------------------------------------------------------------------------------------------------------------------------------------------------------------------------------------------------------------------------------------------------------------------------------------------------------------------------------------------------------------------------------------------------|
| Journal:                        | <i>BMJ Open</i>                                                                                                                                                                                                                                                                                                                                                                                                                                                                                                                                                                                                                                                                                    |
| Manuscript ID:                  | bmjopen-2013-004429                                                                                                                                                                                                                                                                                                                                                                                                                                                                                                                                                                                                                                                                                |
| Article Type:                   | Protocol                                                                                                                                                                                                                                                                                                                                                                                                                                                                                                                                                                                                                                                                                           |
| Date Submitted by the Author:   | 07-Nov-2013                                                                                                                                                                                                                                                                                                                                                                                                                                                                                                                                                                                                                                                                                        |
| Complete List of Authors:       | Kagina, Benjamin; University of Cape Town, Vaccines For Africa Initiative<br>Wiysonge, Charles; University of Cape Town, Vaccines For Africa Initiative; Stellenbosch University, Centre for Evidence-based Health Care<br>Machingaidze, Shingai; University of Cape Town, Vaccines For Africa Initiative<br>Abdullahi, Leila; University of Cape Town, Vaccines For Africa Initiative<br>Adebayo, Esther; University of Cape Town, Vaccines For Africa Initiative<br>Uthman, Olalekan; University of Warwick, Coventry, Warwick Centre for Applied Health Research and Delivery (WCAHRD), Division of Health Sciences<br>Hussey, Gregory; University of Cape Town, Vaccines For Africa Initiative |
| <b>Primary Subject Heading</b>: | Public health                                                                                                                                                                                                                                                                                                                                                                                                                                                                                                                                                                                                                                                                                      |
| Secondary Subject Heading:      | Infectious diseases                                                                                                                                                                                                                                                                                                                                                                                                                                                                                                                                                                                                                                                                                |
| Keywords:                       | Public health < INFECTIOUS DISEASES, PUBLIC HEALTH, PREVENTIVE MEDICINE                                                                                                                                                                                                                                                                                                                                                                                                                                                                                                                                                                                                                            |
|                                 |                                                                                                                                                                                                                                                                                                                                                                                                                                                                                                                                                                                                                                                                                                    |

SCHOLARONE™  
Manuscripts

1  
2  
3  
4  
5  
6  
7 **The use of supplementary immunisation activities to improve uptake of**  
8 **current and future vaccines in low-income and middle-income countries: a**  
9 **systematic review protocol**  
10  
11  
12  
13

14  
15  
16  
17 Benjamin M Kagina<sup>1</sup>, Charles S Wiysonge<sup>1,2</sup>, Shingai Machingaidze<sup>1</sup>, Leila H  
18 Abdullahi<sup>1</sup>, Esther Adebayo<sup>1</sup>, Olalekan A Uthman<sup>2,3</sup>, Gregory D Hussey<sup>1</sup>  
19  
20  
21  
22  
23  
24  
25  
26

27 <sup>1</sup> Vaccines for Africa Initiative, Division of Medical Microbiology & Institute of  
28 Infectious Disease and Molecular Medicine, University of Cape Town, Cape  
29 Town, University of Cape Town  
30  
31  
32

33  
34 <sup>2</sup> Centre for Evidence-based Health Care, Faculty of Medicine and Health  
35 Sciences, Stellenbosch University, Tygerberg Campus, Cape Town, South Africa  
36  
37

38  
39 <sup>3</sup> Warwick Centre for Applied Health Research and Delivery (WCAHRD), Division  
40 of Health Sciences, Warwick Medical School, University of Warwick,  
41 Coventry, United Kingdom,  
42  
43  
44  
45  
46  
47  
48  
49  
50  
51  
52  
53  
54  
55  
56  
57  
58  
59  
60

## Abstract

**Introduction:** Immunisation coverage data in low-income and middle-income countries (LMICs) suggests more strategies need to be implemented to achieve and sustain optimal vaccine uptake. Among possible strategies to improve immunisation coverage, are supplementary immunisation activities (SIAs). We are therefore interested in conducting a systematic review to assess whether SIAs complement routine immunisation programmes to improve vaccination coverage and prevent disease outbreaks.

**Methods:** Our systematic review will focus on studies conducted in LMICs. With the help of an information specialist, we will search for eligible studies in PubMed, Web of Science, Scopus, Africa-Wide, Cochrane Library, WHOLIS, CINAHL, PDQ-Evidence as well as reference lists of relevant publications. Additionally, we will contact relevant organizations such as WHO and GAVI. We will screen search outputs, select studies and extract data in duplicate; resolving discrepancies by discussion and consensus.

**Discussion:** The findings from this systematic review will be discussed in the context of strengthening routine childhood immunisation services, routine adolescent immunisation services, and introduction of future vaccines against tuberculosis and HIV/AIDS.

## Background

Infectious diseases are prevalent in low-income and middle-income countries (LMICs). For example, tuberculosis (TB) is a pandemic of great public health concern. In 2011, the World Health Organization (WHO) estimated that 1.4 million people died worldwide from TB [1]. To control the TB pandemic, stakeholders have proposed multipronged approaches; including development of new and more effective vaccines, novel and better drug regimens, faster and more accurate diagnostic tools as well as strengthening of public health systems. Among these approaches, more effective TB vaccines are likely to have the greatest impact [2]. Research and development of new and better TB vaccines has been accelerated. There were twelve new TB vaccines candidates in human clinical trials in the year 2012 [3, 4]. For the effective TB vaccines to achieve the desired impact, vaccination coverage must be optimal.

Uptake of vaccines delivered through routine immunisation programmes remains variable, and often poor in many LMICs [5, 6], suggesting that routine immunisation services alone are insufficient to achieve optimal immunisation coverage in LMICs. Taking into account that TB burden is highest in LMICs [7], it is likely that future effective TB vaccines will not reach desirable vaccination coverage in these settings if delivered only through the routine immunisation services. Therefore, additional strategies will need to be adopted to improve immunisation coverage, including supplementary immunisation activities (SIAs)[8, 9]

1  
2  
3  
4  
5  
6 SIAs have been successfully used in different disease conditions, including  
7  
8 typhoid , measles [10-12], polio [13], human papillomavirus [14] and cholera [15].  
9  
10 The major reported benefits of SIAs are increased immunisation coverage,  
11  
12 reduced disease spread and cost-effectiveness [16]. Abu-Raddad *et al* have  
13  
14 used a mathematical model to show a significant additive public health benefit in  
15  
16 the reduction of TB incidence by incorporating SIAs to other key interventions of  
17  
18 neonatal vaccination and better TB treatment and diagnostic tools [2].  
19  
20  
21  
22  
23

24  
25 However, the use of SIAs to improve immunisation coverage and prevents  
26  
27 disease outbreaks in LMICs relative to routine immunisation services remain  
28  
29 controversial [8, 17]. To utilise SIAs successfully in the control of TB with future  
30  
31 effective vaccines, it is worthwhile to synthesize the current best evidence on the  
32  
33 effectiveness of this strategy. A study conducted in South Africa, a middle-  
34  
35 income country with a high burden of TB, showed that TB incidence peaks in  
36  
37 adolescence and adolescents are the greatest force of *Mycobacterium*  
38  
39 *tuberculosis* (*M.tb*) infection within a population [18]. This study suggests that a  
40  
41 new effective TB vaccine would have the greatest impact in the control of TB  
42  
43 when targeted to the adolescent population. We propose to conduct a systematic  
44  
45 review to assess whether, at present, there exists evidence that SIAs improve  
46  
47 immunisation coverage and reduce disease burden in LMICs.  
48  
49  
50  
51  
52  
53  
54

55 To the best of our knowledge, the most recent comprehensive systematic review  
56  
57  
58  
59  
60

1  
2  
3 on SIAs was conducted by Dietz and Cutts in 1997 and involved studies  
4 published up to 1992 [16]. Since then, there have been many changes, among  
5 them, population increase [19], change in disease epidemiology [20], emergence  
6 of anti-vaccine groups [21] as well as expanded healthcare infrastructure. These  
7 changes may negatively affect the performance of immunisation services in  
8 obtaining optimal vaccination coverage. Furthermore, new vaccines continue to  
9 be incorporated to the existing Expanded Programme on Immunisation (EPI) [22,  
10 23], adding more logistical and financial pressure to the routine immunisation  
11 services.  
12  
13  
14  
15  
16  
17  
18  
19  
20  
21  
22  
23  
24  
25  
26

27 In the context of these changes that may affect the vaccination coverage, it is  
28 rational to hypothesize that at present, the effects of SIAs in complementing  
29 routine immunisation services may be different from those reported in the past by  
30 Dietz and Cutts in 1997. In support of this hypothesis, some authors reported that  
31 SIAs negatively affect the routine immunisation services [24, 25] whereas some  
32 studies, report the opposite: SIAs increase immunisation coverage and reduce  
33 disease outbreaks [26-29]. Therefore, an up to date systematic review is critical  
34 to provide evidence on the relevance of SIAs in the current health systems  
35 environment. This evidence will be useful, particularly for LMICs because these  
36 settings are the epicentre of vaccine-preventable diseases and (by definition)  
37 have limited resources.  
38  
39  
40  
41  
42  
43  
44  
45  
46  
47  
48  
49  
50  
51  
52  
53  
54  
55  
56  
57  
58  
59  
60

## Objectives

- 1) To determine whether SIAs increase vaccination coverage and reduce disease outbreaks in LMICs
- 2) To describe the lessons learnt during SIAs and how these may guide the introduction of future vaccines (TB, HIV, malaria) in LMICs.

## Methods

### Types of studies:

We will consider primary studies with the following designs:

- Intervention studies: individually randomised controlled trials (RCTs), cluster-randomised controlled trials (cRCT), non-randomised control trials, interrupted time series (ITS), and controlled before-and-after studies (CBAs)
- Observational studies: cohort studies, case-control studies, and cross-sectional studies.

Review articles will be excluded.

### Study settings

Studies conducted in LMICs as defined by the World Bank GDP ranking in July 2013.

## Types of interventions

This study will focus on SIAs, also referred to as mass vaccination campaigns. SIAs are defined as immunisation activities whereby a vaccine is taken simultaneously to many residents of a community within a defined short space of time. We will exclude studies of routine immunisation services, that is, immunisation services rendered (at fixed, outreach or mobile sites) regularly throughout the year. In addition, mass campaigns conducted for other purposes other than immunisation, for example, mass information campaigns to educate communities about general health issues will not be included.

## Types of outcome measures

Primary outcomes:

- Vaccination coverage achieved during SIAs
- Disease outbreaks
- Disease incidence

Secondary outcomes:

- Routine immunisation coverage

## Search methods for identification of studies

A comprehensive search strategy will be developed, including various terms relating to SIAs and LIMCs, for identification of both published and unpublished articles with no language restriction. We will search academic peer-reviewed journals, grey literature (non-published or non-reviewed papers, reports), and



1  
2  
3 reference lists of relevant publications. The detailed electronic search strategy is  
4 provided in appendix 1 while the summary of the search outputs retrieved from  
5 different databases is in appendix 2.  
6  
7  
8  
9

### 10 11 12 **Electronic searches**

13 We will search the following electronic databases for primary studies

- 14 • Pubmed
  - 15 • Web of Science
  - 16 • Cochrane Central Register of Controlled trials (CENTRAL)
  - 17 • Scopus
  - 18 • Africa Wide
  - 19 • PDQ-Evidence
  - 20 • WHOLIS
  - 21 • CINAHL
- 22  
23  
24  
25  
26  
27  
28  
29  
30  
31  
32  
33  
34  
35  
36  
37  
38

### 39 **Data collection and analysis**

#### 40 **Selection of studies**

41 Two authors will independently screen the search outputs for potentially eligible  
42 studies, compare their results, and resolve disagreements by discussion and  
43 consensus. The two authors will then independently go through the full text of all  
44 potentially eligible studies to assess whether the studies meet the inclusion  
45 criteria defined by the study design, setting, intervention and outcomes.  
46  
47  
48  
49  
50  
51  
52  
53  
54  
55  
56  
57  
58  
59  
60

1  
2  
3 Discrepancies in the list of eligible studies between the two authors will be  
4  
5 resolved through discussion and consensus.  
6  
7  
8  
9

### 10 11 12 **Data extraction**

13  
14 A structured and standardised data collection form has been developed for  
15  
16 extracting data from the selected studies. The form will capture key study  
17  
18 characteristics, including methods, participants and outcomes (appendix 3). Prior  
19  
20 to use, the extraction form will be piloted on at least four included studies  
21  
22 identified randomly from the list of included studies.  
23  
24  
25  
26  
27  
28

### 29 30 **Assessment of risk of bias in included studies**

31  
32 The quality of studies will be assessed using the Cochrane Collaboration's tool  
33  
34 for assessing risk of bias [30] for experimental studies and the SIGN checklist for  
35  
36 other study designs [31].  
37  
38  
39  
40  
41

### 42 43 **Measures of treatment effect**

44  
45 We will express the result of each study as a risk ratio with its corresponding  
46  
47 95% confidence intervals for dichotomous data, or mean difference with its  
48  
49 standard deviation for continuous data. We will conduct meta-analysis for the  
50  
51 same type of participants, interventions, study designs, and outcome measures  
52  
53 where homogeneity of data allows. Heterogeneity will be assessed using the chi-  
54  
55 squared test of homogeneity, and quantified using the I-squared statistic [32, 33].  
56  
57  
58  
59  
60

### **Dealing with missing data**

For the recently (2010 onwards) published literature, if any selected study has incomplete or missing data, we will contact the authors for more information. If the authors provide no additional information, a decision will be taken by at least two authors on the inclusion of the study in the final analyses.

### **Assessment of heterogeneity**

We anticipate substantial variation in study results due to differences in the study design, co-interventions, study settings (low-income versus lower-middle-income versus upper-middle-income countries), and risk of bias. We will examine statistical heterogeneity between study results using the Chi-squared test of homogeneity (with significance defined at the alpha-level of 10%), and quantify any statistical heterogeneity between study results using the I-squared statistic [30].

### **Assessment of reporting biases**

A funnel plot will be used to investigate the risk of publication bias by intervention type, provided 10 or more studies are included in the analysis for each intervention type [34, 35]. The funnel plot will be critically examined for asymmetry.

### **Sensitivity analysis**

1  
2  
3 We will conduct sensitivity analysis to establish if the meta-analysis results are  
4 influenced by: the effect of study designs; publication type (peer-reviewed versus  
5 grey literature) the geographical settings (low-income versus lower-middle-  
6 income versus upper-middle-income countries); and study period (published  
7 before 2000 versus published after 2000).  
8  
9  
10  
11  
12  
13  
14  
15  
16

## 17 **Discussion**

18  
19 This systematic review will establish whether SIAs improves immunisation  
20 coverage, prevent disease outbreaks, and have negative impact on routine  
21 immunisation services in LMICs. The review will provide an up-to-date evidence  
22 base of the benefits and harms of the use of SIAs in the control of vaccine-  
23 preventable disease. Additionally, we will discuss how the findings of this review  
24 may be applicable in the context of future vaccines against TB, HIV and malaria.  
25  
26  
27  
28  
29  
30  
31  
32  
33  
34  
35  
36  
37  
38  
39  
40  
41  
42  
43  
44  
45  
46  
47  
48  
49  
50  
51  
52  
53  
54  
55  
56  
57  
58  
59  
60

## Contributoship Statement

BMK, CSW, SM and GDH conceived the study.

BMK, SM, LHA and EA wrote the protocol with supervision from CSH and GDH  
OAU wrote the statistical analysis plan for the study and provided comments to the manuscript.

GDH sourced the funds for the study.

## Funding

This work was supported by the Aeras Global TB Foundation

## References:

1. WHO: **World TB Day, 24 March 2013**. <http://www.who.int/campaigns/tb-day/2013/event/en/>. Accessed on 1<sup>st</sup> October 2013.
2. Abu-Raddad LJ, Sabatelli L, Achterberg JT, Sugimoto JD, Longini IM, Jr., Dye C, Halloran ME: **Epidemiological benefits of more-effective tuberculosis vaccines, drugs, and diagnostics**. *Proc Natl Acad Sci U S A* 2009, **106**(33):13980-13985.
3. Brennan MJ, Stone MR, Evans T: **A rational vaccine pipeline for tuberculosis**. *Int J Tuberc Lung Dis* 2012, **16**(12):1566-1573.
4. Kaufmann SH, Hussey G, Lambert PH: **New vaccines for tuberculosis**. *Lancet* 2010, **375**(9731):2110-2119.
5. Machingaidze S, Wiysonge CS, Hussey GD: **Strengthening the expanded programme on immunization in Africa: looking beyond 2015**. *PLoS medicine* 2013, **10**(3):e1001405.
6. Tao W, Petzold M, Forsberg BC: **Routine vaccination coverage in low- and middle-income countries: further arguments for accelerating support to child vaccination services**. *Global health action* 2013, **6**:20343.
7. WHO: **Global Tuberculosis Report**. 2012.
8. Weiss WM, Rahman MD, Solomon R, Ward D: **Determinants of performance of supplemental immunization activities for polio eradication in Uttar Pradesh, India: social mobilization activities of the Social mobilization Network (SM Net) and Core Group Polio Project (CGPP)**. *BMC Infect Dis* 2013, **13**:17.
9. Yang J, Acosta CJ, Si GA, Zeng J, Li CY, Liang DB, Ochiai RL, Page AL, Danovaro-Holliday MC, Zhang J *et al*: **A mass vaccination campaign targeting adults and children to prevent typhoid fever in Hechi; expanding the use of Vi polysaccharide vaccine in southeast China: a cluster-randomized trial**. *BMC Public Health* 2005, **5**:49.
10. Vijayaraghavan M, Martin RM, Sangrujee N, Kimani GN, Oyombe S, Kalu A, Runyago A, Wanjau G, Cairns L, Muchiri SN: **Measles supplemental immunization activities improve measles vaccine coverage and equity: Evidence from Kenya, 2002**. *Health Policy* 2007, **83**(1):27-36.
11. Otten M, Kezaala R, Fall A, Masresha B, Martin R, Cairns L, Eggers R, Biellik R, Grabowsky M, Strebel P *et al*: **Public-health impact of accelerated measles control in the WHO African Region 2000-03**. *Lancet* 2005, **366**(9488):832-839.

12. Wiysonge CS, Nomo E, Mawo JN, Ticha JM: **Accelerated measles control in sub-Saharan Africa.** *Lancet* 2006, **367**(9508):394-395.
13. Sutter RW, Maher C: **Mass vaccination campaigns for polio eradication: an essential strategy for success.** *Curr Top Micro* 2006, **304**:195-220.
14. Brotherton JM, Fridman M, May CL, Chappell G, Saville AM, Gertig DM: **Early effect of the HPV vaccination programme on cervical abnormalities in Victoria, Australia: an ecological study.** *Lancet* 2011, **377**(9783):2085-2092.
15. Schaetti C, Ali SM, Chaignat CL, Khatib AM, Hutubessy R, Weiss MG: **Improving community coverage of oral cholera mass vaccination campaigns: lessons learned in Zanzibar.** *PLoS One* 2012, **7**(7):e41527.
16. Dietz V, Cutts F: **The use of mass campaigns in the expanded program on immunization: a review of reported advantages and disadvantages.** *Int J Health Serv* 1997, **27**(4):767-790.
17. Mahomed H, Ehrlich R, Hawkrigde T, Hatherill M, Geiter L, Kafaar F, Abrahams DA, Mulenga H, Tameris M, Geldenhuys H *et al*: **TB Incidence in an Adolescent Cohort in South Africa.** *PLoS One* 2013, **8**(3):e59652.
18. Middelkoop K, Bekker LG, Liang H, Aquino LD, Sebastian E, Myer L, Wood R: **Force of tuberculosis infection among adolescents in a high HIV and TB prevalence community: a cross-sectional observation study.** *BMC Infect Dis* 2011, **11**:156.
19. Hales S, de Wet N, Maindonald J, Woodward A: **Potential effect of population and climate changes on global distribution of dengue fever: an empirical model.** *Lancet* 2002, **360**(9336):830-834.
20. Gushulak BD, MacPherson DW: **Globalization of infectious diseases: the impact of migration.** *Clin Infect Di* 2004, **38**(12):1742-1748.
21. Gangarosa EJ, Galazka AM, Wolfe CR, Phillips LM, Gangarosa RE, Miller E, Chen RT: **Impact of anti-vaccine movements on pertussis control: the untold story.** *Lancet* 1998, **351**(9099):356-361.
22. Pawinski R, Debrus S, Delem A, Smolenov I, Suryakiran PV, Han HH: **Rotarix in developing countries: paving the way for inclusion in national childhood immunization programs in Africa.** *J Infect Dis* 2010, **202** Suppl:S80-86.

- 1  
2  
3  
4  
5  
6  
7  
8  
9  
10  
11  
12  
13  
14  
15  
16  
17  
18  
19  
20  
21  
22  
23  
24  
25  
26  
27  
28  
29  
30  
31  
32  
33  
34  
35  
36  
37  
38  
39  
40  
41  
42  
43  
44  
45  
46  
47  
48  
49  
50  
51  
52  
53  
54  
55  
56  
57  
58  
59  
60
23. Burchett HE, Mounier-Jack S, Griffiths UK, Biellik R, Ongolo-Zogo P, Chavez E, Sarma H, Uddin J, Konate M, Kitaw Y *et al*: **New vaccine adoption: qualitative study of national decision-making processes in seven low- and middle-income countries.** *Health Policy and Plann* 2012, **27 Suppl 2**:ii5-16.
24. Verguet S, Jassat W, Hedberg C, Tollman S, Jamison DT, Hofman KJ: **Measles control in Sub-Saharan Africa: South Africa as a case study.** *Vaccine* 2012, **30**(9):1594-1600.
25. Verguet S, Jassat W, Bertram MY, Tollman SM, Murray CJ, Jamison DT, Hofman KJ: **Impact of supplemental immunisation activity (SIA) campaigns on health systems: findings from South Africa.** *J Epidemiol and Commu H* 2013.
26. De Wals P, De Serres G, Niyonsenga T: **Effectiveness of a mass immunization campaign against serogroup C meningococcal disease in Quebec.** *JAMA* 2001, **285**(2):177-181.
27. Wiysonge CS, Mawo JN, Ticha JM, Nomo E, Shey MS: **Migration and measles.** *Int J Epidemiol* 2005, **34**(6):1443-1444.
28. Uzicanin A, Zhou F, Eggers R, Webb E, Strebel P: **Economic analysis of the 1996-1997 mass measles immunization campaigns in South Africa.** *Vaccine* 2004, **22**(25-26):3419-3426.
29. Zuber PL, Conombo KS, Traore AD, Millogo JD, Ouattara A, Ouedraogo IB, Valian A: **Mass measles vaccination in urban Burkina Faso, 1998.** *B World Health Organ* 2001, **79**(4):296-300.
30. JPT H: **Cochrane Handbook for Systematic Reviews of Interventions Version 5.1.0** 2011.
31. **Methodology Checklists; Health Improvement Scotland** [<http://www.sign.ac.uk/methodology/checklists.html>] Accessed on 6<sup>th</sup> November 2013.
32. Higgins JP, Thompson SG: **Quantifying heterogeneity in a meta-analysis.** *Stat Med* 2002, **21**(11):1539-1558.
33. Higgins JP, Thompson SG, Deeks JJ, Altman DG: **Measuring inconsistency in meta-analyses.** *BMJ* 2003, **327**(7414):557-560.
34. Sterne JA, Egger M: **Funnel plots for detecting bias in meta-analysis: guidelines on choice of axis.** *J Clin Epidemiol* 2001, **54**(10):1046-1055.



- 1  
2  
3  
4  
5  
6  
7  
8  
9  
10  
11  
12  
13  
14  
15  
16  
17  
18  
19  
20  
21  
22  
23  
24  
25  
26  
27  
28  
29  
30  
31  
32  
33  
34  
35  
36  
37  
38  
39  
40  
41  
42  
43  
44  
45  
46  
47  
48  
49  
50  
51  
52  
53  
54  
55  
56  
57  
58  
59  
60
35. Sterne JA, Sutton AJ, Ioannidis JP, Terrin N, Jones DR, Lau J, Carpenter J, Rucker G, Harbord RM, Schmid CH *et al*: **Recommendations for examining and interpreting funnel plot asymmetry in meta-analyses of randomised controlled trials.** *BMJ* 2011, **343**:d4002.

For peer review only

**Appendix 1: Proposed search strategy and search outputs for PubMed database**

|     | <b>Query</b>                                                                                                                                                                                                                                                                                                                                                                                                                                                                                                                                                                                                                                                                                                                                                                                                                                                                                                                                                                                                                                                                                                                                                                                                                                                                                                                                                                                                                     | <b>Output</b> |
|-----|----------------------------------------------------------------------------------------------------------------------------------------------------------------------------------------------------------------------------------------------------------------------------------------------------------------------------------------------------------------------------------------------------------------------------------------------------------------------------------------------------------------------------------------------------------------------------------------------------------------------------------------------------------------------------------------------------------------------------------------------------------------------------------------------------------------------------------------------------------------------------------------------------------------------------------------------------------------------------------------------------------------------------------------------------------------------------------------------------------------------------------------------------------------------------------------------------------------------------------------------------------------------------------------------------------------------------------------------------------------------------------------------------------------------------------|---------------|
| #10 | #9 AND #3                                                                                                                                                                                                                                                                                                                                                                                                                                                                                                                                                                                                                                                                                                                                                                                                                                                                                                                                                                                                                                                                                                                                                                                                                                                                                                                                                                                                                        | 2464          |
| #9  | #4 OR #5 OR #6 OR #7 OR #8                                                                                                                                                                                                                                                                                                                                                                                                                                                                                                                                                                                                                                                                                                                                                                                                                                                                                                                                                                                                                                                                                                                                                                                                                                                                                                                                                                                                       | 2310098       |
| #8  | developing countries[MeSH Terms]                                                                                                                                                                                                                                                                                                                                                                                                                                                                                                                                                                                                                                                                                                                                                                                                                                                                                                                                                                                                                                                                                                                                                                                                                                                                                                                                                                                                 | 60129         |
| #7  | (Low income country OR lower income country OR third world country OR middle income country)                                                                                                                                                                                                                                                                                                                                                                                                                                                                                                                                                                                                                                                                                                                                                                                                                                                                                                                                                                                                                                                                                                                                                                                                                                                                                                                                     | 100285        |
| #6  | (Angola OR Republic of Angola OR Albania OR Republic of Albania OR Algeria OR The People's Democratic Republic of Algeria OR American Samoa OR Argentina OR Azerbaijan OR Belarus OR Belize OR Bosnia and Herzegovina OR Bosnia-Herzegovina OR Bosnia OR Botswana OR Brazil OR Federative Republic of Brazil OR Bulgaria OR China OR People's Republic of China OR Colombia OR Costa Rica OR Fiji OR Gabon OR Gabonese Republic OR Grenada OR Hungary OR Islamic Republic of Iran OR Persia OR Iran OR Iraq OR Jamaica OR Jordan OR Hashemite Kingdom of Jordan OR Kazakhstan OR Lebanon OR Lebanese Republic OR Libya OR State of Libya OR Macedonia OR Republic of Macedonia OR Malaysia OR Maldives OR Republic of the Maldives OR Maldive Islands OR Marshall Islands OR Republic of the Marshall Islands OR Palau OR Republic of Palau OR Panama OR Republic of Panama OR Peru OR Romania OR Serbia, OR the Republic of Serbia OR Seychelles OR the Republic of Seychelles OR South Africa OR Saint Lucia OR Saint Vincent and the Grenadines OR Suriname OR Thailand OR Kingdom of Thailand OR Tonga OR Kingdom of Tonga OR Tunisia OR Turkey OR Turkmenistan OR Turkmenia OR Cuba OR Dominica OR Commonwealth of Dominica OR The Dominican Republic OR Ecuador OR Mauritius OR Mexico OR United Mexican States OR Montenegro OR Namibia OR Tuvalu OR Ellice Islands OR Venezuela OR the Bolivarian Republic of Venezuela) | 1488488       |
| #5  | (Armenia OR armenia OR Bhutan OR Kingdom of Bhutan OR Bolivia OR Plurinational State of Bolivia                                                                                                                                                                                                                                                                                                                                                                                                                                                                                                                                                                                                                                                                                                                                                                                                                                                                                                                                                                                                                                                                                                                                                                                                                                                                                                                                  | 589800        |

|    |                                                                                                                                                                                                                                                                                                                                                                                                                                                                                                                                                                                                                                                                                                                                                                                                                                                                                                                                                                                                                                                                                                                                                                                                                                                                                                                                                                                                                                                                                                                                                                                                                                                                                                                                                                                                                                  |        |
|----|----------------------------------------------------------------------------------------------------------------------------------------------------------------------------------------------------------------------------------------------------------------------------------------------------------------------------------------------------------------------------------------------------------------------------------------------------------------------------------------------------------------------------------------------------------------------------------------------------------------------------------------------------------------------------------------------------------------------------------------------------------------------------------------------------------------------------------------------------------------------------------------------------------------------------------------------------------------------------------------------------------------------------------------------------------------------------------------------------------------------------------------------------------------------------------------------------------------------------------------------------------------------------------------------------------------------------------------------------------------------------------------------------------------------------------------------------------------------------------------------------------------------------------------------------------------------------------------------------------------------------------------------------------------------------------------------------------------------------------------------------------------------------------------------------------------------------------|--------|
|    | <p>OR Cameroon OR Republic of Cameroon OR Republic of Cameroun OR Cape Verde OR Republic of Cape Verde OR Cote D'ivoire OR Ivory Coast OR Republic of Cote D'ivoire OR Djibouti OR Republic of Djibouti OR Arab Republic of Egypt OR Egypt OR El Salvador OR Georgia OR Ghana OR Republic of Ghana OR Guatemala OR Republic of Guatemala OR Guyana OR Co-operative Republic of Guyana OR Honduras OR Republic of Honduras OR Spanish Honduras OR Republic of Indonesia OR Indonesia OR India OR Republic of India OR Kiribati OR Republic of Kiribati OR Kosovo OR Kosovo and Metohija OR Laos OR Lao Lao People's Democratic Republic OR Lesotho OR Kingdom of Lesotho OR Mauritania OR Islamic Republic of Mauritania OR Micronesia, Fed. Sts. OR Federated States of Micronesia OR FSM OR Moldova OR Republic of Moldova OR Mongolia OR Morocco OR Kingdom of Morocco OR Nicaragua OR Republic of Nicaragua OR Nigeria OR Federal Republic of Nigeria OR Pakistan OR Islamic Republic of Pakistan OR Papua New Guinea OR Independent State of Papua New Guinea OR Paraguay OR Republic of Paraguay OR Philippines OR Republic of the Philippines OR Samoa OR Independent State of Samoa OR Sao Tome and Principe OR Democratic Republic of Sao Tome and Principe OR Senegal OR Republic of Senegal OR Solomon Islands OR Sri Lanka OR Democratic Socialist Republic of Sri Lanka OR Sudan OR Republic of the Sudan OR North Sudan OR Swaziland OR Kingdom of Swaziland OR Ngwane OR Yuwatini OR Syrian Arab Republic OR Syria OR East Timor OR Timor-leste OR Democratic Republic of Timor-leste OR Ukraine OR Uzbekistan OR Republic of Uzbekistan OR Vanuatu OR Republic of Vanuatu OR Vietnam OR the Socialist Republic of Vietnam OR West bank and Gaza OR Yemen OR Yemeni Republic OR Zambia OR Republic of Zambia.)</p> |        |
| #4 | <p>(Afghanistan OR Islamic Republic of Afghanistan OR Bangladesh OR People's Republic of Bangladesh OR Benin OR Dahomey OR Republic of Benin OR Burkina Faso OR Burkina OR Republic of Upper Volta OR Burundi OR Republic of Burundi OR Cambodia OR Kingdom of</p>                                                                                                                                                                                                                                                                                                                                                                                                                                                                                                                                                                                                                                                                                                                                                                                                                                                                                                                                                                                                                                                                                                                                                                                                                                                                                                                                                                                                                                                                                                                                                               | 277397 |

|    |                                                                                                                                                                                                                                                                                                                                                                                                                                                                                                                                                                                                                                                                                                                                                                                                                                                                                                                                                                                                                                                                                                                                                                                                                                                                                                                           |      |
|----|---------------------------------------------------------------------------------------------------------------------------------------------------------------------------------------------------------------------------------------------------------------------------------------------------------------------------------------------------------------------------------------------------------------------------------------------------------------------------------------------------------------------------------------------------------------------------------------------------------------------------------------------------------------------------------------------------------------------------------------------------------------------------------------------------------------------------------------------------------------------------------------------------------------------------------------------------------------------------------------------------------------------------------------------------------------------------------------------------------------------------------------------------------------------------------------------------------------------------------------------------------------------------------------------------------------------------|------|
|    | Cambodia OR Central African Republic OR Chad OR Republic of Chad OR Comoros OR Union of the Comoros OR Democratic Republic of the Congo OR DR Congo OR Congo-Kinshasa OR DRC OR Zaire OR Eritrea OR State of Eritrea OR Ethiopia OR Federal Democratic Republic of Ethiopia OR The Gambia OR Republic of the Gambia OR Guinea OR Republic of Guinea OR Guinea-Conakry OR Guinea-Bissau OR Republic of Guinea-Bissau OR Haiti OR Republic of Haiti OR Kenya OR Republic of Kenya OR North Korea OR Democratic People's Republic of Korea OR Kyrgyz Republic OR Kyrgyzstan OR Liberia OR Republic of Liberia OR Madagascar OR Republic of Madagascar OR Malawi OR Republic of Malawi OR The Warm Heart of Africa OR Mali OR Republic of Mali OR Mozambique OR Republic of Mozambique OR Myanmar OR Burma OR Republic of the Union of Myanmar OR Nepal OR Democratic Republic of Nepal OR Niger OR Republic of Niger OR Rwanda OR Republic of Rwanda OR Sierra Leone OR Republic of Sierra Leone OR Somalia OR Federal Republic of Somalia OR South Sudan OR Republic of South Sudan OR Tajikistan OR Republic of Tajikistan OR Tanzania OR United Republic of Tanzania OR Republic of Tanganyika and Zanzibar OR Togo OR Togolese Republic OR Uganda OR Republic of Uganda OR Zimbabwe OR Republic of Zimbabwe OR Rhodesia) |      |
| #3 | #1 OR #2                                                                                                                                                                                                                                                                                                                                                                                                                                                                                                                                                                                                                                                                                                                                                                                                                                                                                                                                                                                                                                                                                                                                                                                                                                                                                                                  | 7923 |
| #2 | (Mass immunization OR mass immunisation OR supplemental immunization OR supplemental immunisation OR supplementary immunization OR supplementary immunisation)                                                                                                                                                                                                                                                                                                                                                                                                                                                                                                                                                                                                                                                                                                                                                                                                                                                                                                                                                                                                                                                                                                                                                            | 7923 |
| #1 | "mass vaccination"[MeSH Terms]                                                                                                                                                                                                                                                                                                                                                                                                                                                                                                                                                                                                                                                                                                                                                                                                                                                                                                                                                                                                                                                                                                                                                                                                                                                                                            | 1823 |

**Appendix 2: Summary of the search outputs retrieved from different databases using the proposed search strategy**

| Name of the database                                     | Number of search outputs retrieved | Status of the search process |
|----------------------------------------------------------|------------------------------------|------------------------------|
| Pubmed                                                   | 2464                               | Completed                    |
| Web of Science                                           | 274                                | Completed                    |
| Cochrane Central Register of Controlled trials (CENTRAL) | 140                                | Completed                    |
| Scopus                                                   | 2914                               | Completed                    |
| Africa Wide                                              | 1042                               | Completed                    |
| PDQ-Evidence                                             | 157                                | Completed                    |
| WHOLIS                                                   | 14                                 | Completed                    |
| CINAHL                                                   | 94                                 | Completed                    |

### Appendix 3: Proposed data extraction form

#### 1) Details of person extracting the data

|                                        | Description | Comments |
|----------------------------------------|-------------|----------|
| Name of researcher completing the form |             |          |
| Date when form completed (dd/mm/yyyy)  |             |          |

#### 2) General information

| Description of the study                                                     | Enter as appearing in the publication                                                                                                                                                                                       | Reference page/table or figure in the study |
|------------------------------------------------------------------------------|-----------------------------------------------------------------------------------------------------------------------------------------------------------------------------------------------------------------------------|---------------------------------------------|
| Study ID based on surname of first author and year (e.g <i>Hussey 2001</i> ) |                                                                                                                                                                                                                             |                                             |
| Study reference                                                              |                                                                                                                                                                                                                             |                                             |
| Correspondence author and the contact details:                               |                                                                                                                                                                                                                             |                                             |
| Publication type                                                             | <input type="checkbox"/> Full text <input type="checkbox"/> Abstract<br><input type="checkbox"/> Governmental or chapter non-governmental reports <input type="checkbox"/> Book<br><input type="checkbox"/> Other (specify) |                                             |
| Source of funding and cost of SIA per participant                            |                                                                                                                                                                                                                             |                                             |
| References of potentially eligible studies from the reference list           |                                                                                                                                                                                                                             |                                             |

|                       |  |
|-----------------------|--|
| <b>Notes/Comments</b> |  |
|-----------------------|--|

### 3) Study eligibility assessment

| <b>Characteristics</b>                                                  | <b>Tick or describe as appropriate</b>                                                                                                                                    | <b>Reference page/table or figure in article</b> |
|-------------------------------------------------------------------------|---------------------------------------------------------------------------------------------------------------------------------------------------------------------------|--------------------------------------------------|
| <b>Primary study</b>                                                    | <input type="checkbox"/> Yes (Primary) <span style="margin-left: 200px;"><input type="checkbox"/> No</span>                                                               |                                                  |
| <b>Type of study design</b>                                             |                                                                                                                                                                           |                                                  |
| <b>Unit of allocation to the intervention</b><br><i>(if applicable)</i> | <input type="checkbox"/> Individual<br><input type="checkbox"/> Household<br><input type="checkbox"/> Cluster<br><input type="checkbox"/> Other (Specify)                 |                                                  |
| <b>Informed consent obtained for study</b><br><i>(if applicable)</i>    | <input type="checkbox"/> Yes <span style="margin-left: 50px;"><input type="checkbox"/> No</span> <span style="margin-left: 50px;"><input type="checkbox"/> Unclear</span> |                                                  |
| <b>Ethical approval obtained for study</b><br><i>(if applicable)</i>    | <input type="checkbox"/> Yes <span style="margin-left: 50px;"><input type="checkbox"/> No</span> <span style="margin-left: 50px;"><input type="checkbox"/> Unclear</span> |                                                  |
| <b>SIAs conducted in LMIC</b>                                           | <input type="checkbox"/> Yes <span style="margin-left: 200px;"><input type="checkbox"/> No</span>                                                                         |                                                  |
| <b>If yes, category of country or countries</b>                         | <input type="checkbox"/> Low-income country<br><input type="checkbox"/> Lower middle-income country<br><input type="checkbox"/> Upper middle-income country               |                                                  |
| <b>Name of the country</b>                                              |                                                                                                                                                                           |                                                  |

|                                                                                                                                        |                                            |                                                                                                                                                                                                                                                                                                                                                                  |                                          |  |
|----------------------------------------------------------------------------------------------------------------------------------------|--------------------------------------------|------------------------------------------------------------------------------------------------------------------------------------------------------------------------------------------------------------------------------------------------------------------------------------------------------------------------------------------------------------------|------------------------------------------|--|
| 1<br>2<br>3<br>4<br>5<br>6<br>7<br>8<br>9                                                                                              | <b>Study describes SIAs</b>                | <input type="checkbox"/> Yes                                                                                                                                                                                                                                                                                                                                     | <input type="checkbox"/> No              |  |
| 10<br>11<br>12<br>13<br>14                                                                                                             | <b>Name of vaccine used in the SIAs</b>    |                                                                                                                                                                                                                                                                                                                                                                  |                                          |  |
| 15<br>16<br>17<br>18<br>19<br>20<br>21<br>22<br>23<br>24<br>25<br>26<br>27<br>28<br>29<br>30<br>31<br>32<br>33<br>34<br>35<br>36<br>37 | <b>Disease targeted by the SIAs</b>        |                                                                                                                                                                                                                                                                                                                                                                  |                                          |  |
| 38<br>39<br>40<br>41<br>42<br>43<br>44                                                                                                 | <b>Outcome measures</b>                    | <input type="checkbox"/> Yes<br>Vaccination coverage attained by the SIAs<br><br><input type="checkbox"/> Yes<br>Disease outbreaks<br><br><input type="checkbox"/> Yes<br>Disease incidence<br><br><input type="checkbox"/> Yes<br>Routine immunization coverage after SIAs)<br><br><input type="checkbox"/> Other (specify):<br><br><input type="checkbox"/> No |                                          |  |
| 45<br>46<br>47<br>48<br>49<br>50<br>51<br>52<br>53<br>54<br>55<br>56<br>57<br>58<br>59<br>60                                           | <b>Final decision on study eligibility</b> | <input type="checkbox"/> Yes<br>(Include)                                                                                                                                                                                                                                                                                                                        | <input type="checkbox"/> No<br>(Exclude) |  |
|                                                                                                                                        | <b>Reason(s) for exclusion</b>             |                                                                                                                                                                                                                                                                                                                                                                  |                                          |  |

**NB: Do not proceed to the next step if the study is excluded from the review**

#### 4) Study aims and methods

|               | <b>Describe as stated in report/paper/book chapter</b> | <b>Reference page/table or figure in the study</b> |
|---------------|--------------------------------------------------------|----------------------------------------------------|
| <b>Aim(s)</b> |                                                        |                                                    |



|                                                                                                                                              |                                                                                                                                                                                                       |                                                                                                                                                                                                                                                                                                                              |  |
|----------------------------------------------------------------------------------------------------------------------------------------------|-------------------------------------------------------------------------------------------------------------------------------------------------------------------------------------------------------|------------------------------------------------------------------------------------------------------------------------------------------------------------------------------------------------------------------------------------------------------------------------------------------------------------------------------|--|
| 1<br>2<br>3<br>4<br>5<br>6                                                                                                                   | <b>Methods to estimate target population for SIAs</b>                                                                                                                                                 |                                                                                                                                                                                                                                                                                                                              |  |
| 7<br>8<br>9                                                                                                                                  | <b>Methods to estimate SIAs coverage</b>                                                                                                                                                              |                                                                                                                                                                                                                                                                                                                              |  |
| 10<br>11<br>12<br>13                                                                                                                         | <b>Period between SIAs and coverage survey (if applicable)</b>                                                                                                                                        |                                                                                                                                                                                                                                                                                                                              |  |
| 14<br>15<br>16                                                                                                                               | <b>SIAs start date</b>                                                                                                                                                                                |                                                                                                                                                                                                                                                                                                                              |  |
| 17<br>18<br>19<br>20<br>21<br>22<br>23<br>24<br>25<br>26                                                                                     | <b>SIAs end date</b><br><br><i>(NB: If SIAs were conducted in more than one phase, duplicate the two rows as appropriate).</i>                                                                        |                                                                                                                                                                                                                                                                                                                              |  |
| 27<br>28<br>29<br>30<br>31<br>32<br>33<br>34<br>35<br>36                                                                                     | <b>Total duration of the SIAs (in days)</b><br><br><i>(NB: If SIAs were conducted in more than one phase, duplicate this row as appropriate).</i>                                                     |                                                                                                                                                                                                                                                                                                                              |  |
| 37<br>38<br>39<br>40<br>41<br>42<br>43<br>44<br>45<br>46<br>47<br>48<br>49<br>50<br>51<br>52<br>53<br>54<br>55<br>56<br>57<br>58<br>59<br>60 | <b>Means of communicating the information about the SIAs to the target population (phase 1)</b><br><br><i>(NB: If SIAs were conducted in more than one phase, duplicate this row as appropriate).</i> | <input type="checkbox"/> Healthcare facility<br><br><input type="checkbox"/> Door to door<br><br><input type="checkbox"/> Word of mouth<br><br><input type="checkbox"/> Mass media (radio, TV etc)<br><br><input type="checkbox"/> Digital media (text message, emails etc)<br><br><input type="checkbox"/> Other (specify): |  |

|                                                                                      |                                                                                                                                                                    |  |
|--------------------------------------------------------------------------------------|--------------------------------------------------------------------------------------------------------------------------------------------------------------------|--|
| <b>Potential interference of SIA with routine immunization services investigated</b> | <input type="checkbox"/> Yes (explain):<br><br><input type="checkbox"/> No                                                                                         |  |
| <b>Personnel performing the vaccinations during the SIAs</b>                         | <input type="checkbox"/> Doctors<br><br><input type="checkbox"/> Nurses<br><br><input type="checkbox"/> Volunteers<br><br><input type="checkbox"/> Other (specify) |  |
| <b>Number of personnel performing the vaccinations during the SIAs (if provided)</b> |                                                                                                                                                                    |  |
| Notes:                                                                               |                                                                                                                                                                    |  |

### 5) Participants

| Characteristics                                                                          | Description                                                                                                                                                                                         | Reference page/table or figure in the study |
|------------------------------------------------------------------------------------------|-----------------------------------------------------------------------------------------------------------------------------------------------------------------------------------------------------|---------------------------------------------|
| <b>SIA setting</b>                                                                       | <input type="checkbox"/> Rural community <input type="checkbox"/> Urban <input type="checkbox"/> Displaced<br><br><input type="checkbox"/> Other (specify)                                          |                                             |
| <b>Socio-economic status of the target population relative to the general population</b> | <input type="checkbox"/> Low (L) (AA) <input type="checkbox"/> Average (A) <input type="checkbox"/> Above average<br><br><input type="checkbox"/> All (L, A &AA) <input type="checkbox"/> Not clear |                                             |

|                                           |                                                                                         |                                                                                             |  |
|-------------------------------------------|-----------------------------------------------------------------------------------------|---------------------------------------------------------------------------------------------|--|
| 1<br>2<br>3<br>4<br>5<br>6<br>7<br>8<br>9 | <b>Methods used to classify the socio-economic status of the SIAs target population</b> |                                                                                             |  |
| 10<br>11<br>12<br>13<br>14                | <b>Total number of participants enrolled for the SIAs</b>                               |                                                                                             |  |
| 15<br>16<br>17                            | <b>Age</b>                                                                              |                                                                                             |  |
| 18<br>19<br>20<br>21                      | <b>Gender</b>                                                                           | <input type="checkbox"/> Female <input type="checkbox"/> Male <input type="checkbox"/> Both |  |
| 22<br>23<br>24<br>25<br>26<br>27          | <b>Notes (provide any other relevant information on the participants):</b>              |                                                                                             |  |

### 6) Outcome measures

| 30<br>31<br>32<br>33<br>34<br>35                                                             | Details of the outcome                                                                                                                             | Characteristics of the outcomes |   |       |     | Reference page/table or figure in the study |
|----------------------------------------------------------------------------------------------|----------------------------------------------------------------------------------------------------------------------------------------------------|---------------------------------|---|-------|-----|---------------------------------------------|
|                                                                                              |                                                                                                                                                    | F                               | M | Total | Age |                                             |
| 36<br>37<br>38<br>39<br>40<br>41<br>42<br>43<br>44<br>45<br>46<br>47<br>48<br>49<br>50<br>51 | <b>Participants vaccinated during the SIAs period</b><br><br><i>(NB: If SIAs were conducted in more than one phase, duplicate as appropriate).</i> | Targeted                        |   |       |     |                                             |
|                                                                                              |                                                                                                                                                    | Vaccinated                      |   |       |     |                                             |
|                                                                                              |                                                                                                                                                    | Coverage attained               |   |       |     |                                             |
| 52<br>53<br>54<br>55<br>56<br>57<br>58<br>59<br>60                                           | <b>Routine immunization</b>                                                                                                                        | Before:                         |   |       |     |                                             |

|                                                                                                                                                  |                |  |
|--------------------------------------------------------------------------------------------------------------------------------------------------|----------------|--|
| <p>coverage before and after SIAs (NB: If SIAs were conducted in more than one phase, duplicate this row as appropriate).</p>                    | <p>After:</p>  |  |
| <p>Incidence of target disease before and after SIAs (NB: If SIAs were conducted in more than one phase, duplicate this row as appropriate).</p> | <p>Before:</p> |  |
| <p>Incidence of target disease before and after SIAs (NB: If SIAs were conducted in more than one phase, duplicate this row as appropriate).</p> | <p>After:</p>  |  |
| <p>Percentage reduction or increase in the routine immunization coverage (NB: specify increase or decrease)</p>                                  |                |  |
| <p>Notes:</p>                                                                                                                                    |                |  |

### 7) Risk of bias assessment

| Type of bias                            | Tick appropriately and describe below after the tick.                                                  | Reference page/table or figure in the study |
|-----------------------------------------|--------------------------------------------------------------------------------------------------------|---------------------------------------------|
| <p>Is there selection bias? (Assess</p> | <p><input type="checkbox"/> Yes    <input type="checkbox"/> No    <input type="checkbox"/> Unclear</p> |                                             |

|                                                                                                                                                                                                                    |                                                                                           |  |
|--------------------------------------------------------------------------------------------------------------------------------------------------------------------------------------------------------------------|-------------------------------------------------------------------------------------------|--|
| <b>comparability of groups at baseline, confounding and adjustment. For RCTs assess sequence generation and allocation concealment).</b>                                                                           |                                                                                           |  |
| <b>Is there performance bias? (Assess fidelity of the interventions, and quality of the information regarding who received which interventions, including blinding of study subjects and healthcare providers)</b> | <input type="checkbox"/> Yes <input type="checkbox"/> No <input type="checkbox"/> Unclear |  |
| <b>Is there detection bias? (Assess whether there was biased and correct appraisal of outcomes, including blinding of assessors)</b>                                                                               | <input type="checkbox"/> Yes <input type="checkbox"/> No <input type="checkbox"/> Unclear |  |
| <b>Is there attrition bias? (Assess the completeness of sample, follow-up and outcome data, reasons for loss to follow up explained)</b>                                                                           | <input type="checkbox"/> Yes <input type="checkbox"/> No <input type="checkbox"/> Unclear |  |
| <b>Is there reporting bias (Assess selective reporting of results)</b>                                                                                                                                             | <input type="checkbox"/> Yes <input type="checkbox"/> No <input type="checkbox"/> Unclear |  |
| <b>Other biases (specify)</b>                                                                                                                                                                                      | <input type="checkbox"/> Yes <input type="checkbox"/> No <input type="checkbox"/> Unclear |  |

### 8) Other relevant information

|                                         | <b>Descriptions/figures as stated in report/paper/book chapter</b> | <b>Reference page/table or figure in the study</b> |
|-----------------------------------------|--------------------------------------------------------------------|----------------------------------------------------|
| <b>Key conclusions from the authors</b> |                                                                    |                                                    |

1  
2  
3  
4  
5  
6  
7  
8  
9  
10  
11  
12  
13  
14  
15  
16  
17  
18  
19  
20  
21  
22  
23  
24  
25  
26  
27  
28  
29  
30  
31  
32  
33  
34  
35  
36  
37  
38  
39  
40  
41  
42  
43  
44  
45  
46  
47  
48  
49  
50  
51  
52  
53  
54  
55  
56  
57  
58  
59  
60

|              |  |  |
|--------------|--|--|
| <b>Notes</b> |  |  |
|--------------|--|--|

For peer review only



**The use of supplementary immunisation activities to improve uptake of current and future vaccines in low-income and middle-income countries: a systematic review protocol**

|                                 |                                                                                                                                                                                                                                                                                                                                                                                                                                                                                                                                                                                                                                                                                                    |
|---------------------------------|----------------------------------------------------------------------------------------------------------------------------------------------------------------------------------------------------------------------------------------------------------------------------------------------------------------------------------------------------------------------------------------------------------------------------------------------------------------------------------------------------------------------------------------------------------------------------------------------------------------------------------------------------------------------------------------------------|
| Journal:                        | <i>BMJ Open</i>                                                                                                                                                                                                                                                                                                                                                                                                                                                                                                                                                                                                                                                                                    |
| Manuscript ID:                  | bmjopen-2013-004429.R1                                                                                                                                                                                                                                                                                                                                                                                                                                                                                                                                                                                                                                                                             |
| Article Type:                   | Protocol                                                                                                                                                                                                                                                                                                                                                                                                                                                                                                                                                                                                                                                                                           |
| Date Submitted by the Author:   | 16-Jan-2014                                                                                                                                                                                                                                                                                                                                                                                                                                                                                                                                                                                                                                                                                        |
| Complete List of Authors:       | Kagina, Benjamin; University of Cape Town, Vaccines For Africa Initiative<br>Wiysonge, Charles; University of Cape Town, Vaccines For Africa Initiative; Stellenbosch University, Centre for Evidence-based Health Care<br>Machingaidze, Shingai; University of Cape Town, Vaccines For Africa Initiative<br>Abdullahi, Leila; University of Cape Town, Vaccines For Africa Initiative<br>Adebayo, Esther; University of Cape Town, Vaccines For Africa Initiative<br>Uthman, Olalekan; University of Warwick, Coventry, Warwick Centre for Applied Health Research and Delivery (WCAHRD), Division of Health Sciences<br>Hussey, Gregory; University of Cape Town, Vaccines For Africa Initiative |
| <b>Primary Subject Heading</b>: | Public health                                                                                                                                                                                                                                                                                                                                                                                                                                                                                                                                                                                                                                                                                      |
| Secondary Subject Heading:      | Infectious diseases                                                                                                                                                                                                                                                                                                                                                                                                                                                                                                                                                                                                                                                                                |
| Keywords:                       | Public health < INFECTIOUS DISEASES, PUBLIC HEALTH, PREVENTIVE MEDICINE                                                                                                                                                                                                                                                                                                                                                                                                                                                                                                                                                                                                                            |
|                                 |                                                                                                                                                                                                                                                                                                                                                                                                                                                                                                                                                                                                                                                                                                    |

SCHOLARONE™  
Manuscripts

1  
2  
3  
4  
5  
6  
7 **The use of supplementary immunisation activities to improve uptake of**  
8 **current and future vaccines in low-income and middle-income countries: a**  
9 **systematic review protocol**  
10  
11  
12  
13

14  
15  
16  
17 Benjamin M Kagina<sup>1</sup>, Charles S Wiysonge<sup>1,2</sup>, Shingai Machingaidze<sup>1</sup>, Leila H  
18 Abdullahi<sup>1</sup>, Esther Adebayo<sup>1</sup>, Olalekan A Uthman<sup>2,3</sup>, Gregory D Hussey<sup>1</sup>  
19  
20  
21  
22  
23  
24  
25  
26

27 <sup>1</sup> Vaccines for Africa Initiative, Division of Medical Microbiology & Institute of  
28 Infectious Disease and Molecular Medicine, University of Cape Town, Cape  
29 Town, University of Cape Town  
30  
31  
32

33  
34 <sup>2</sup> Centre for Evidence-based Health Care, Faculty of Medicine and Health  
35 Sciences, Stellenbosch University, Tygerberg Campus, Cape Town, South Africa  
36  
37

38  
39 <sup>3</sup> Warwick Centre for Applied Health Research and Delivery (WCAHRD), Division  
40 of Health Sciences, Warwick Medical School, University of Warwick,  
41 Coventry, United Kingdom.  
42  
43  
44  
45  
46  
47

48 Competing interests: None declared  
49  
50  
51  
52  
53  
54  
55  
56  
57  
58  
59  
60



## Abstract

**Introduction:** Immunisation coverage data in low-income and middle-income countries (LMICs) suggests more strategies need to be implemented to achieve and sustain optimal vaccine uptake. Among possible strategies to improve immunisation coverage, are supplementary immunisation activities (SIAs). We are therefore interested in conducting a systematic review to assess whether SIAs complement routine immunisation programmes to improve vaccination coverage and prevent disease outbreaks.

**Methods:** Our systematic review will focus on studies conducted in LMICs. With the help of an information specialist, we will search for eligible studies in PubMed, Web of Science, Scopus, Africa-Wide, Cochrane Library, WHOLIS, CINAHL, PDQ-Evidence as well as reference lists of relevant publications. Additionally, we will contact relevant organizations such as WHO and GAVI. Two authors will independently extract data from eligible studies and independently assess risk of bias by assessing the adequacy of study characteristics. The primary meta-analysis will use random effects models due to expected inter-studies heterogeneity. Dichotomous data will be analysed using relative risk and continuous data using weighted mean differences (or standardised mean differences), both with 95% confidence intervals.

**Discussion:** The findings from this systematic review will be discussed in the context of strengthening routine childhood immunisation services, routine adolescent immunisation services, and introduction of future vaccines against tuberculosis and HIV/AIDS.

1  
2  
3 **Study strengths:** unbiased selection of many studies conducted in different  
4 settings. This will strengthen the validity of the review results.  
5  
6

7  
8 **Study limitations:** heterogeneity of the study settings of the low-income, lower-  
9 middle income and upper-middle income countries as well as heterogeneity in  
10 study designs.  
11  
12  
13  
14  
15  
16  
17  
18  
19  
20  
21  
22  
23  
24  
25  
26  
27  
28  
29  
30  
31  
32  
33  
34  
35  
36  
37  
38  
39  
40  
41  
42  
43  
44  
45  
46  
47  
48  
49  
50  
51  
52  
53  
54  
55  
56  
57  
58  
59  
60

## Background

Infectious diseases are prevalent in low-income and middle-income countries (LMICs). For example, tuberculosis (TB) is a pandemic of great public health concern. In 2011, the World Health Organization (WHO) estimated that 1.4 million people died worldwide from TB [1]. To control the TB pandemic, stakeholders have proposed multipronged approaches; including development of new and more effective vaccines, novel and better drug regimens, faster and more accurate diagnostic tools as well as strengthening of public health systems. Among these approaches, more effective TB vaccines are likely to have the greatest impact [2]. Research and development of new and better TB vaccines has been accelerated. There were twelve new TB vaccines candidates in human clinical trials in the year 2012 [3, 4]. For the effective TB vaccines to achieve the desired impact, vaccination coverage must be optimal.

Uptake of vaccines delivered through routine immunisation programmes remains variable, and often poor in many LMICs [5, 6], suggesting that routine immunisation services alone are insufficient to achieve optimal immunisation coverage in LMICs. Taking into account that TB burden is highest in LMICs [7], it is likely that future effective TB vaccines will not reach desirable vaccination coverage in these settings if delivered only through the routine immunisation services. Therefore, additional strategies will need to be adopted to improve immunisation coverage, including supplementary immunisation activities (SIAs)[8, 9]

1  
2  
3  
4  
5  
6 SIAs have been successfully used in different disease conditions, including  
7  
8 typhoid , measles [10-12], polio [13], human papillomavirus [14] and cholera [15].  
9  
10 The major reported benefits of SIAs are increased immunisation coverage,  
11  
12 reduced disease spread and cost-effectiveness [16]. Abu-Raddad *et al* have  
13  
14 used a mathematical model to show a significant additive public health benefit in  
15  
16 the reduction of TB incidence by incorporating SIAs to other key interventions of  
17  
18 neonatal vaccination and better TB treatment and diagnostic tools [2].  
19  
20  
21  
22  
23

24  
25 However, the use of SIAs to improve immunisation coverage and prevents  
26  
27 disease outbreaks in LMICs relative to routine immunisation services remain  
28  
29 controversial [8, 17]. To utilise SIAs successfully in the control of TB with future  
30  
31 effective vaccines, it is worthwhile to synthesize the current best evidence on the  
32  
33 effectiveness of this strategy. A study conducted in South Africa, a middle-  
34  
35 income country with a high burden of TB, showed that TB incidence peaks in  
36  
37 adolescence and adolescents are the greatest force of *Mycobacterium*  
38  
39 *tuberculosis* (*M.tb*) infection within a population [18]. This study suggests that a  
40  
41 new effective TB vaccine would have the greatest impact in the control of TB  
42  
43 when targeted to the adolescent population. We propose to conduct a systematic  
44  
45 review to assess whether, at present, there exists evidence that SIAs improve  
46  
47 immunisation coverage and reduce disease burden in LMICs.  
48  
49  
50  
51  
52  
53  
54

55 To the best of our knowledge, the most recent comprehensive systematic review  
56  
57  
58  
59  
60

1  
2  
3 on SIAs was conducted by Dietz and Cutts in 1997 and involved studies  
4 published up to 1992 [16]. Since then, there have been many changes, among  
5 them, population increase [19], change in disease epidemiology [20], emergence  
6 of anti-vaccine groups [21] as well as expanded healthcare infrastructure. These  
7 changes may negatively affect the performance of immunisation services in  
8 obtaining optimal vaccination coverage. Furthermore, new vaccines continue to  
9 be incorporated to the existing Expanded Programme on Immunisation (EPI) [22,  
10 23], adding more logistical and financial pressure to the routine immunisation  
11 services.  
12  
13  
14  
15  
16  
17  
18  
19  
20  
21  
22  
23

24  
25  
26  
27 In the context of these changes that may affect the vaccination coverage, it is  
28 rational to hypothesize that at present, the effects of SIAs in complementing  
29 routine immunisation services may be different from those reported in the past by  
30 Dietz and Cutts in 1997. In support of this hypothesis, some authors reported that  
31 SIAs negatively affect the routine immunisation services [24, 25] whereas some  
32 studies, report the opposite: SIAs increase immunisation coverage and reduce  
33 disease outbreaks [26-29]. Therefore, an up to date systematic review is critical  
34 to provide evidence on the relevance of SIAs in the current health systems  
35 environment. This evidence will be useful, particularly for LMICs because these  
36 settings are the epicentre of vaccine-preventable diseases and (by definition)  
37 have limited resources.  
38  
39  
40  
41  
42  
43  
44  
45  
46  
47  
48  
49  
50  
51  
52  
53  
54  
55  
56  
57  
58  
59  
60

## Objectives

- 1) To determine whether SIAs increase vaccination coverage and reduce disease outbreaks in LMICs
- 2) To describe the lessons learnt during SIAs and how these may guide the introduction of future vaccines (TB, HIV, malaria) in LMICs.

## Methods

### Types of studies:

We will consider primary studies with the following designs:

- Intervention studies: individually randomised controlled trials (RCTs), cluster-randomised controlled trials (cRCT), non-randomised control trials, interrupted time series (ITS), and controlled before-and-after studies (CBAs)
- Observational studies: cohort studies, case-control studies, and cross-sectional studies.

Review articles will be excluded.

### Study settings

Studies conducted in LMICs as defined by the World Bank GDP ranking in July 2013.

## Types of interventions

This study will focus on SIAs, also referred to as mass vaccination campaigns. SIAs are defined as immunisation activities whereby a vaccine is taken simultaneously to many residents of a community within a defined short space of time. We will exclude studies of routine immunisation services, that is, immunisation services rendered (at fixed, outreach or mobile sites) regularly throughout the year. In addition, mass campaigns conducted for other purposes other than immunisation, for example, mass information campaigns to educate communities about general health issues will not be included.

## Types of outcome measures

Primary outcomes:

- Vaccination coverage achieved during SIAs
- Disease outbreaks
- Disease incidence

Secondary outcomes:

- Immunisation coverage

## Search methods for identification of studies

A comprehensive search strategy will be developed, including various terms relating to SIAs and LIMCs, for identification of both published and unpublished articles with no language restriction. We will search academic peer-reviewed journals, grey literature (non-published or non-reviewed papers, reports), and

1  
2  
3 reference lists of relevant publications. The detailed electronic search strategy is  
4 provided in appendix 1 while the summary of the search outputs retrieved from  
5 different databases is in appendix 2.  
6  
7  
8  
9

### 10 11 12 **Electronic searches**

13  
14 We will search the following electronic databases for primary studies: Pubmed,  
15 Web of Science, Cochrane Central Register of Controlled trials (CENTRAL),  
16 Scopus, Africa Wide, PDQ-Evidence, WHOLIS and CINAHL.  
17  
18  
19  
20  
21

### 22 23 24 **Data collection and analysis**

#### 25 26 **Selection of studies**

27  
28 Two authors will independently screen the search outputs for potentially eligible  
29 studies, compare their results, and resolve disagreements by discussion and  
30 consensus. The two authors will then independently go through the full text of all  
31 potentially eligible studies to assess whether the studies meet the inclusion  
32 criteria defined by the study design, setting, intervention and outcomes.  
33 Discrepancies in the list of eligible studies between the two authors will be  
34 resolved through discussion and consensus.  
35  
36  
37  
38  
39  
40  
41  
42  
43  
44  
45  
46  
47

#### 48 49 **Data extraction**

50  
51 A structured and standardised data collection form has been developed for  
52 extracting data from the selected studies. The form will capture key study  
53 characteristics, including methods, participants and outcomes (appendix 3). Prior  
54  
55  
56  
57  
58  
59  
60



1  
2  
3 to use, the extraction form will be piloted on at least four included studies  
4  
5 identified randomly from the list of included studies.  
6  
7  
8  
9

### 10 **Assessment of risk of bias in included studies**

11  
12 The quality of studies will be assessed using the Cochrane Collaboration's tool  
13 for assessing risk of bias [30] for experimental studies and the Scottish  
14 Intercollegiate Guidelines Network (SIGN) checklist for other study designs [31].  
15  
16  
17  
18  
19

### 20 **Measures of treatment effect**

21  
22 We will express the result of each study as a risk ratio with its corresponding  
23 95% confidence intervals for dichotomous data, or mean difference with its  
24 standard deviation for continuous data. We will conduct meta-analysis for the  
25 same type of participants, interventions, study designs, and outcome measures  
26 where homogeneity of data allows. Heterogeneity will be assessed using the chi-  
27 squared test of homogeneity, and quantified using the I-squared statistic [32, 33].  
28  
29  
30  
31  
32  
33  
34  
35  
36  
37  
38  
39

### 40 **Dealing with missing data**

41  
42 The data will be analysed on an intention-to-treat basis as far as possible and  
43 attempts will be made to obtain missing data from the original corresponding  
44 author. Where missing data is unobtainable, imputation of individual values will  
45 be undertaken for the primary outcomes only. For other outcomes, only the  
46 available data will be analysed. Any imputation undertaken will be subjected to  
47 sensitivity analysis. If studies report sufficient detail to calculate mean differences  
48  
49  
50  
51  
52  
53  
54  
55  
56  
57  
58  
59  
60

1  
2  
3 but no information on associated standard deviation (SD), the outcome will be  
4  
5 assumed to have standard deviation equal to the highest SD from other studies  
6  
7 within the same analysis.  
8  
9

### 10 11 12 **Data synthesis**

13  
14 All eligible studies will be summarised and analysed using Stata version 12 for  
15  
16 Windows. Two authors will extract the data, the first author will enter all data and  
17  
18 second author recheck all entries. Disagreements will be resolved by discussion.  
19  
20 If the studies are sufficiently similar, we will combine the data using random-  
21  
22 effects model due to anticipated heterogeneity that may result from the difference  
23  
24 in methodology and study settings. Where the rating scales used in the studies  
25  
26 have a reasonably large number of categories (more than 10) the data will be  
27  
28 treated as continuous variables arising from a normal distribution. We will use  
29  
30 weighted mean difference (WMD) when the pooled studies use the same rating  
31  
32 scale or test, and the standardised mean difference (SMD), the absolute mean  
33  
34 difference divided by the standard deviation when the studies use different rating  
35  
36 scales or tests. When the rating scales used are fewer than 10 and more than  
37  
38 two, we will concatenate the data into two categories that best represent the  
39  
40 contrasting states of interest, and treat the outcome measure as binary. Study  
41  
42 results for dichotomous data will be expressed as relative risk (RR) and 95%  
43  
44 confidence interval (CI). Time-to-event outcomes or generic inverse variance  
45  
46 outcomes, such as survival time and time to cure will be expressed as the log  
47  
48 hazards ratio and 95% CI.  
49  
50  
51  
52  
53  
54  
55  
56  
57  
58  
59  
60

1  
2  
3 When studies cannot be combined for meta-analysis due to diversity of  
4 interventions, narrative syntheses will be conducted and results of individual  
5 studies will be displayed graphically to enable more succinct summary of  
6 evidence.  
7  
8  
9  
10  
11  
12

### 13 14 15 **Unit of analysis**

16  
17 All cluster randomised trials that meet the inclusion criteria will be included in the  
18 meta-analysis after adjusting for design effect using variation inflation method  
19 [34, 35]: design effect =  $1 + (M - 1)ICC$ , where M is the average cluster size and  
20 ICC is the intra-cluster correlation coefficient. If the authors did not report the  
21 ICC, we will use ICC from a similar published trial. For estimated values of ICC,  
22 we will conduct sensitivity analyses using larger and smaller ICCs to determine if  
23 the results are robust.  
24  
25  
26  
27  
28  
29  
30  
31  
32  
33  
34  
35  
36

### 37 **Assessment of heterogeneity**

38 We anticipate substantial variation in study results due to differences in the study  
39 design, co-interventions, study settings (low-income versus lower-middle-income  
40 versus upper-middle-income countries), and risk of bias. We will examine  
41 statistical heterogeneity between study results using the Chi-squared test of  
42 homogeneity (with significance defined at the alpha-level of 10%), and quantify  
43 any statistical heterogeneity between study results using the I-squared statistic  
44 [30].  
45  
46  
47  
48  
49  
50  
51  
52  
53  
54  
55  
56  
57  
58  
59  
60

### **Assessment of reporting biases**

A funnel plot will be used to investigate the risk of publication bias by intervention type, provided 10 or more studies are included in the analysis for each intervention type [36, 37]. The funnel plot will be critically examined for asymmetry.

### **Sensitivity analysis**

We will conduct sensitivity analysis to establish if the meta-analysis results are influenced by: the effect of study designs; publication type (peer-reviewed versus grey literature) the geographical settings (low-income versus lower-middle-income versus upper-middle-income countries); and study period (published before 2000 versus published after 2000).

### **Discussion**

This systematic review will establish whether SIAs improves immunisation coverage, prevent disease outbreaks, and have negative impact on routine immunisation services in LMICs. The review will provide an up-to-date evidence base of the benefits and harms of the use of SIAs in the control of vaccine-preventable disease. Additionally, we will discuss how the findings of this review may be applicable in the context of future vaccines against TB, HIV and malaria.

1  
2  
3 **Funding:** This work was supported by the Aeras Global TB Foundation  
4  
5

6 **Contributorship Statement:** BMK, CSW, SM and GDH conceived the study.  
7

8  
9 BMK, SM, LHA and EA wrote the protocol with supervision from CSH and GDH  
10

11 OAU wrote the statistical analysis plan for the study and provided comments to  
12 the manuscript.  
13

14 GDH sourced the funds for the study.  
15

16 **Competing Interests:** None  
17  
18

19  
20 **Data Sharing Statement:** We the authors, declare that this research protocol is  
21 original work. Results from the study completed using this protocol will be  
22 published in a peer reviewed journal  
23  
24  
25  
26  
27  
28  
29  
30  
31  
32  
33  
34  
35  
36  
37  
38  
39  
40  
41  
42  
43  
44  
45  
46  
47  
48  
49  
50  
51  
52  
53  
54  
55  
56  
57  
58  
59  
60

## References:

1. WHO: **World TB Day, 24 March 2013**. <http://www.who.int/campaigns/tb-day/2013/event/en/>. Accessed on 1<sup>st</sup> October 2013.
2. Abu-Raddad LJ, Sabatelli L, Achterberg JT, et al.: **Epidemiological benefits of more-effective tuberculosis vaccines, drugs, and diagnostics**. *Proc Natl Acad Sci U S A* 2009, **106**(33):13980-13985.
3. Brennan MJ, Stone MR, Evans T: **A rational vaccine pipeline for tuberculosis**. *Int J Tuberc Lung Dis* 2012, **16**(12):1566-1573.
4. Kaufmann SH, Hussey G, Lambert PH: **New vaccines for tuberculosis**. *Lancet* 2010, **375**(9731):2110-2119.
5. Machingaidze S, Wiysonge CS, Hussey GD: **Strengthening the expanded programme on immunization in Africa: looking beyond 2015**. *PLoS medicine* 2013, **10**(3):e1001405.
6. Tao W, Petzold M, Forsberg BC: **Routine vaccination coverage in low- and middle-income countries: further arguments for accelerating support to child vaccination services**. *Global health action* 2013, **6**:20343.
7. WHO: **Global Tuberculosis Report**. In.; 2012.
8. Weiss WM, Rahman MD, Solomon R, et al.: **Determinants of performance of supplemental immunization activities for polio eradication in Uttar Pradesh, India: social mobilization activities of the Social mobilization Network (SM Net) and Core Group Polio Project (CGPP)**. *BMC Infect Dis* 2013, **13**:17.
9. Yang J, Acosta CJ, Si GA, et al.: **A mass vaccination campaign targeting adults and children to prevent typhoid fever in Hechi; expanding the use of Vi polysaccharide vaccine in southeast China: a cluster-randomized trial**. *BMC Public Health* 2005, **5**:49.
10. Vijayaraghavan M, Martin RM, Sangrujee N, et al.: **Measles supplemental immunization activities improve measles vaccine coverage and equity: Evidence from Kenya, 2002**. *Health Policy* 2007, **83**(1):27-36.

- 1  
2  
3 11. Otten M, Kezaala R, Fall A, *et al.*: **Public-health impact of accelerated**  
4 **measles control in the WHO African Region 2000-03.** *Lancet* 2005,  
5 **366**(9488):832-839.  
6
- 7  
8 12. Wiysonge CS, Nomo E, Mawo JN, *et al.*: **Accelerated measles control in**  
9 **sub-Saharan Africa.** *Lancet* 2006, **367**(9508):394-395.  
10
- 11 13. Sutter RW, Maher C: **Mass vaccination campaigns for polio**  
12 **eradication: an essential strategy for success.** *Curr Top Micro* 2006,  
13 **304**:195-220.  
14
- 15 14. Brotherton JM, Fridman M, May CL, *et al.*: **Early effect of the HPV**  
16 **vaccination programme on cervical abnormalities in Victoria,**  
17 **Australia: an ecological study.** *Lancet* 2011, **377**(9783):2085-2092.  
18
- 19 15. Schaetti C, Ali SM, Chaignat CL, *et al.*: **Improving community coverage**  
20 **of oral cholera mass vaccination campaigns: lessons learned in**  
21 **Zanzibar.** *PLoS One* 2012, **7**(7):e41527.  
22
- 23 16. Dietz V, Cutts F: **The use of mass campaigns in the expanded**  
24 **program on immunization: a review of reported advantages and**  
25 **disadvantages.** *Int J Health Serv* 1997, **27**(4):767-790.  
26
- 27 17. Mahomed H, Ehrlich R, Hawkrigde T, *et al.*: **TB Incidence in an**  
28 **Adolescent Cohort in South Africa.** *PLoS One* 2013, **8**(3):e59652.  
29
- 30 18. Middelkoop K, Bekker LG, Liang H, *et al.*: **Force of tuberculosis**  
31 **infection among adolescents in a high HIV and TB prevalence**  
32 **community: a cross-sectional observation study.** *BMC Infect Dis*  
33 2011, **11**:156.  
34
- 35 19. Hales S, de Wet N, Maindonald J, *et al.*: **Potential effect of population**  
36 **and climate changes on global distribution of dengue fever: an**  
37 **empirical model.** *Lancet* 2002, **360**(9336):830-834.  
38
- 39 20. Gushulak BD, MacPherson DW: **Globalization of infectious diseases:**  
40 **the impact of migration.** *Clin Infect Di* 2004, **38**(12):1742-1748.  
41
- 42 21. Gangarosa EJ, Galazka AM, Wolfe CR, *et al.*: **Impact of anti-vaccine**  
43 **movements on pertussis control: the untold story.** *Lancet* 1998,  
44 **351**(9099):356-361.  
45
- 46 22. Pawinski R, Debrus S, Delem A, *et al.*: **Rotarix in developing countries:**  
47 **paving the way for inclusion in national childhood immunization**  
48 **programs in Africa.** *J Infect Dis* 2010, **202** Suppl:S80-86.  
49  
50  
51  
52  
53  
54  
55  
56  
57  
58  
59  
60

- 1  
2  
3  
4  
5  
6  
7  
8  
9  
10  
11  
12  
13  
14  
15  
16  
17  
18  
19  
20  
21  
22  
23  
24  
25  
26  
27  
28  
29  
30  
31  
32  
33  
34  
35  
36  
37  
38  
39  
40  
41  
42  
43  
44  
45  
46  
47  
48  
49  
50  
51  
52  
53  
54  
55  
56  
57  
58  
59  
60
23. Burchett HE, Mounier-Jack S, Griffiths UK, *et al.*: **New vaccine adoption: qualitative study of national decision-making processes in seven low- and middle-income countries.** *Health Policy and Plann* 2012, **27 Suppl 2**:ii5-16.
  24. Verguet S, Jassat W, Hedberg C, *et al.*: **Measles control in Sub-Saharan Africa: South Africa as a case study.** *Vaccine* 2012, **30**(9):1594-1600.
  25. Verguet S, Jassat W, Bertram MY, Tollman SM, *et al.*: **Impact of supplemental immunisation activity (SIA) campaigns on health systems: findings from South Africa.** *J Epidemiol and Commu H* 2013.
  26. De Wals P, De Serres G, Niyonsenga T: **Effectiveness of a mass immunization campaign against serogroup C meningococcal disease in Quebec.** *JAMA* 2001, **285**(2):177-181.
  27. Wiysonge CS, Mawo JN, Ticha JM, *et al.*: **Migration and measles.** *Int J Epidemiol* 2005, **34**(6):1443-1444.
  28. Uzicanin A, Zhou F, Eggers R, *et al.*: **Economic analysis of the 1996-1997 mass measles immunization campaigns in South Africa.** *Vaccine* 2004, **22**(25-26):3419-3426.
  29. Zuber PL, Conombo KS, Traore AD, *et al.*: **Mass measles vaccination in urban Burkina Faso, 1998.** *B World Health Organ* 2001, **79**(4):296-300.
  30. JPT H: **Cochrane Handbook for Systematic Reviews of Interventions Version 5.1.0** 2011.
  31. **Methodology Checklists; Health Improvement Scotland** [<http://www.sign.ac.uk/methodology/checklists.html>]
  32. Higgins JP, Thompson SG: **Quantifying heterogeneity in a meta-analysis.** *Stat Med* 2002, **21**(11):1539-1558.
  33. Higgins JP, Thompson SG, Deeks JJ, *et al.*: **Measuring inconsistency in meta-analyses.** *BMJ* 2003, **327**(7414):557-560.
  34. JPT H, JJ D, DG A: **Special topics in statistics. The Cochrane Collaboration.** In., edn.; 2011.
  35. Rao JN, Scott AJ: **A simple method for the analysis of clustered binary data.** *Biometrics* 1992, **48**(2):577-585.
  36. Sterne JA, Egger M: **Funnel plots for detecting bias in meta-analysis: guidelines on choice of axis.** *J Clin Epidemiol* 2001, **54**(10):1046-1055.



- 1  
2  
3  
4  
5 37. Sterne JA, Sutton AJ, Ioannidis JP, *et al*: **Recommendations for**  
6 **examining and interpreting funnel plot asymmetry in meta-analyses**  
7 **of randomised controlled trials.** *BMJ* 2011, **343**:d4002.  
8  
9  
10  
11  
12  
13  
14  
15  
16  
17  
18  
19  
20  
21  
22  
23  
24  
25  
26  
27  
28  
29  
30  
31  
32  
33  
34  
35  
36  
37  
38  
39  
40  
41  
42  
43  
44  
45  
46  
47  
48  
49  
50  
51  
52  
53  
54  
55  
56  
57  
58  
59  
60

1  
2  
3  
4  
5  
6  
7  
8  
9  
10  
11  
12  
13  
14  
15  
16  
17  
18  
19  
20  
21  
22  
23  
24  
25  
26  
27  
28  
29  
30  
31  
32  
33  
34  
35  
36  
37  
38  
39  
40  
41  
42  
43  
44  
45  
46  
47  
48  
49  
50  
51  
52  
53  
54  
55  
56  
57  
58  
59  
60

For peer review only

1  
2  
3  
4  
5  
6  
7 **The use of supplementary immunisation activities to improve uptake of**  
8 **current and future vaccines in low-income and middle-income countries: a**  
9 **systematic review protocol**  
10  
11  
12  
13

14  
15  
16  
17 Benjamin M Kagina<sup>1</sup>, Charles S Wiysonge<sup>1,2</sup>, Shingai Machingaidze<sup>1</sup>, Leila H  
18 Abdullahi<sup>1</sup>, Esther Adebayo<sup>1</sup>, Olalekan A Uthman<sup>2,3</sup>, Gregory D Hussey<sup>1</sup>  
19  
20  
21  
22  
23  
24  
25  
26

27 <sup>1</sup> Vaccines for Africa Initiative, Division of Medical Microbiology & Institute of  
28 Infectious Disease and Molecular Medicine, University of Cape Town, Cape  
29 Town, University of Cape Town  
30  
31  
32

33  
34 <sup>2</sup> Centre for Evidence-based Health Care, Faculty of Medicine and Health  
35 Sciences, Stellenbosch University, Tygerberg Campus, Cape Town, South Africa  
36  
37

38  
39 <sup>3</sup> Warwick Centre for Applied Health Research and Delivery (WCAHRD), Division  
40 of Health Sciences, Warwick Medical School, University of Warwick,  
41 Coventry, United Kingdom.  
42  
43  
44  
45  
46  
47

48 **Competing interests: None declared**  
49  
50  
51  
52  
53  
54  
55  
56  
57  
58  
59  
60

## Abstract

**Introduction:** Immunisation coverage data in low-income and middle-income countries (LMICs) suggests more strategies need to be implemented to achieve and sustain optimal vaccine uptake. Among possible strategies to improve immunisation coverage, are supplementary immunisation activities (SIAs). We are therefore interested in conducting a systematic review to assess whether SIAs complement routine immunisation programmes to improve vaccination coverage and prevent disease outbreaks.

**Methods:** Our systematic review will focus on studies conducted in LMICs. With the help of an information specialist, we will search for eligible studies in PubMed, Web of Science, Scopus, Africa-Wide, Cochrane Library, WHOLIS, CINAHL, PDQ-Evidence as well as reference lists of relevant publications. Additionally, we will contact relevant organizations such as WHO and GAVI. **Two authors will independently extract data from eligible studies and independently assess risk of bias by assessing the adequacy of study characteristics. The primary meta-analysis will use random effects models due to expected inter-studies heterogeneity. Dichotomous data will be analysed using relative risk and continuous data using weighted mean differences (or standardised mean differences), both with 95% confidence intervals.**

**Discussion:** The findings from this systematic review will be discussed in the context of strengthening routine childhood immunisation services, routine adolescent immunisation services, and introduction of future vaccines against tuberculosis and HIV/AIDS.

1  
2  
3 **Study strengths:** unbiased selection of many studies conducted in different  
4 settings. This will strengthen the validity of the review results.  
5  
6

7  
8 **Study limitations:** heterogeneity of the study settings of the low-income, lower-  
9 middle income and upper-middle income countries as well as heterogeneity in  
10 study designs.  
11  
12  
13  
14  
15  
16  
17  
18  
19  
20  
21  
22  
23  
24  
25  
26  
27  
28  
29  
30  
31  
32  
33  
34  
35  
36  
37  
38  
39  
40  
41  
42  
43  
44  
45  
46  
47  
48  
49  
50  
51  
52  
53  
54  
55  
56  
57  
58  
59  
60

## Background

Infectious diseases are prevalent in low-income and middle-income countries (LMICs). For example, tuberculosis (TB) is a pandemic of great public health concern. In 2011, the World Health Organization (WHO) estimated that 1.4 million people died worldwide from TB [1]. To control the TB pandemic, stakeholders have proposed multipronged approaches; including development of new and more effective vaccines, novel and better drug regimens, faster and more accurate diagnostic tools as well as strengthening of public health systems. Among these approaches, more effective TB vaccines are likely to have the greatest impact [2]. Research and development of new and better TB vaccines has been accelerated. There were twelve new TB vaccines candidates in human clinical trials in the year 2012 [3, 4]. For the effective TB vaccines to achieve the desired impact, vaccination coverage must be optimal.

Uptake of vaccines delivered through routine immunisation programmes remains variable, and often poor in many LMICs [5, 6], suggesting that routine immunisation services alone are insufficient to achieve optimal immunisation coverage in LMICs. Taking into account that TB burden is highest in LMICs [7], it is likely that future effective TB vaccines will not reach desirable vaccination coverage in these settings if delivered only through the routine immunisation services. Therefore, additional strategies will need to be adopted to improve immunisation coverage, including supplementary immunisation activities (SIAs)[8, 9]

1  
2  
3  
4  
5  
6 SIAs have been successfully used in different disease conditions, including  
7  
8 typhoid , measles [10-12], polio [13], human papillomavirus [14] and cholera [15].  
9  
10 The major reported benefits of SIAs are increased immunisation coverage,  
11  
12 reduced disease spread and cost-effectiveness [16]. Abu-Raddad *et al* have  
13  
14 used a mathematical model to show a significant additive public health benefit in  
15  
16 the reduction of TB incidence by incorporating SIAs to other key interventions of  
17  
18 neonatal vaccination and better TB treatment and diagnostic tools [2].  
19  
20  
21  
22  
23

24  
25 However, the use of SIAs to improve immunisation coverage and prevents  
26  
27 disease outbreaks in LMICs relative to routine immunisation services remain  
28  
29 controversial [8, 17]. To utilise SIAs successfully in the control of TB with future  
30  
31 effective vaccines, it is worthwhile to synthesize the current best evidence on the  
32  
33 effectiveness of this strategy. A study conducted in South Africa, a middle-  
34  
35 income country with a high burden of TB, showed that TB incidence peaks in  
36  
37 adolescence and adolescents are the greatest force of *Mycobacterium*  
38  
39 *tuberculosis* (*M.tb*) infection within a population [18]. This study suggests that a  
40  
41 new effective TB vaccine would have the greatest impact in the control of TB  
42  
43 when targeted to the adolescent population. We propose to conduct a systematic  
44  
45 review to assess whether, at present, there exists evidence that SIAs improve  
46  
47 immunisation coverage and reduce disease burden in LMICs.  
48  
49  
50  
51  
52  
53  
54

55 To the best of our knowledge, the most recent comprehensive systematic review  
56  
57  
58  
59  
60

1  
2  
3 on SIAs was conducted by Dietz and Cutts in 1997 and involved studies  
4  
5 published up to 1992 [16]. Since then, there have been many changes, among  
6  
7 them, population increase [19], change in disease epidemiology [20], emergence  
8  
9 of anti-vaccine groups [21] as well as expanded healthcare infrastructure. These  
10  
11 changes may negatively affect the performance of immunisation services in  
12  
13 obtaining optimal vaccination coverage. Furthermore, new vaccines continue to  
14  
15 be incorporated to the existing Expanded Programme on Immunisation (EPI) [22,  
16  
17 23], adding more logistical and financial pressure to the routine immunisation  
18  
19 services.  
20  
21  
22  
23  
24  
25  
26

27 In the context of these changes that may affect the vaccination coverage, it is  
28  
29 rational to hypothesize that at present, the effects of SIAs in complementing  
30  
31 routine immunisation services may be different from those reported in the past by  
32  
33 Dietz and Cutts in 1997. In support of this hypothesis, some authors reported that  
34  
35 SIAs negatively affect the routine immunisation services [24, 25] whereas some  
36  
37 studies, report the opposite: SIAs increase immunisation coverage and reduce  
38  
39 disease outbreaks [26-29]. Therefore, an up to date systematic review is critical  
40  
41 to provide evidence on the relevance of SIAs in the current health systems  
42  
43 environment. This evidence will be useful, particularly for LMICs because these  
44  
45 settings are the epicentre of vaccine-preventable diseases and (by definition)  
46  
47 have limited resources.  
48  
49  
50  
51  
52  
53  
54  
55  
56  
57  
58  
59  
60



## Objectives

- 1) To determine whether SIAs increase vaccination coverage and reduce disease outbreaks in LMICs
- 2) To describe the lessons learnt during SIAs and how these may guide the introduction of future vaccines (TB, HIV, malaria) in LMICs.

## Methods

### Types of studies:

We will consider primary studies with the following designs:

- Intervention studies: individually randomised controlled trials (RCTs), cluster-randomised controlled trials (cRCT), non-randomised control trials, interrupted time series (ITS), and controlled before-and-after studies (CBAs)
- Observational studies: cohort studies, case-control studies, and cross-sectional studies.

Review articles will be excluded.

### Study settings

Studies conducted in LMICs as defined by the World Bank GDP ranking in July 2013.

## Types of interventions

This study will focus on SIAs, also referred to as mass vaccination campaigns. SIAs are defined as immunisation activities whereby a vaccine is taken simultaneously to many residents of a community within a defined short space of time. We will exclude studies of routine immunisation services, that is, immunisation services rendered (at fixed, outreach or mobile sites) regularly throughout the year. In addition, mass campaigns conducted for other purposes other than immunisation, for example, mass information campaigns to educate communities about general health issues will not be included.

## Types of outcome measures

Primary outcomes:

- Vaccination coverage achieved during SIAs
- Disease outbreaks
- Disease incidence

Secondary outcomes:

- Immunisation coverage

## Search methods for identification of studies

A comprehensive search strategy will be developed, including various terms relating to SIAs and LIMCs, for identification of both published and unpublished articles with no language restriction. We will search academic peer-reviewed journals, grey literature (non-published or non-reviewed papers, reports), and

1  
2  
3 reference lists of relevant publications. The detailed electronic search strategy is  
4 provided in appendix 1 while the summary of the search outputs retrieved from  
5 different databases is in appendix 2.  
6  
7  
8  
9

### 10 11 12 **Electronic searches**

13  
14 We will search the following electronic databases for primary studies: Pubmed,  
15 Web of Science, Cochrane Central Register of Controlled trials (CENTRAL),  
16 Scopus, Africa Wide, PDQ-Evidence, WHOLIS and CINAHL.  
17  
18  
19  
20  
21  
22  
23

### 24 **Data collection and analysis**

#### 25 **Selection of studies**

26  
27 Two authors will independently screen the search outputs for potentially eligible  
28 studies, compare their results, and resolve disagreements by discussion and  
29 consensus. The two authors will then independently go through the full text of all  
30 potentially eligible studies to assess whether the studies meet the inclusion  
31 criteria defined by the study design, setting, intervention and outcomes.  
32 Discrepancies in the list of eligible studies between the two authors will be  
33 resolved through discussion and consensus.  
34  
35  
36  
37  
38  
39  
40  
41  
42  
43  
44  
45  
46  
47

#### 48 **Data extraction**

49  
50 A structured and standardised data collection form has been developed for  
51 extracting data from the selected studies. The form will capture key study  
52 characteristics, including methods, participants and outcomes (appendix 3). Prior  
53  
54  
55  
56  
57  
58  
59  
60

1  
2  
3 to use, the extraction form will be piloted on at least four included studies  
4  
5 identified randomly from the list of included studies.  
6  
7  
8  
9

### 10 **Assessment of risk of bias in included studies**

11  
12 The quality of studies will be assessed using the Cochrane Collaboration's tool  
13 for assessing risk of bias [30] for experimental studies and the **Scottish**  
14 **Intercollegiate Guidelines Network (SIGN)** checklist for other study designs [31].  
15  
16  
17  
18  
19  
20  
21  
22

### 23 **Measures of treatment effect**

24  
25 We will express the result of each study as a risk ratio with its corresponding  
26  
27 95% confidence intervals for dichotomous data, or mean difference with its  
28  
29 standard deviation for continuous data. We will conduct meta-analysis for the  
30  
31 same type of participants, interventions, study designs, and outcome measures  
32  
33 where homogeneity of data allows. Heterogeneity will be assessed using the chi-  
34  
35 squared test of homogeneity, and quantified using the I-squared statistic [32, 33].  
36  
37  
38  
39  
40  
41  
42

### 43 **Dealing with missing data**

44 **The data will be analysed on an intention-to-treat basis as far as possible and**  
45 **attempts will be made to obtain missing data from the original corresponding**  
46 **author. Where missing data is unobtainable, imputation of individual values will**  
47 **be undertaken for the primary outcomes only. For other outcomes, only the**  
48 **available data will be analysed. Any imputation undertaken will be subjected to**  
49 **sensitivity analysis. If studies report sufficient detail to calculate mean differences**  
50  
51  
52  
53  
54  
55  
56  
57  
58  
59  
60

1  
2  
3 but no information on associated standard deviation (SD), the outcome will be  
4  
5 assumed to have standard deviation equal to the highest SD from other studies  
6  
7 within the same analysis.  
8  
9

### 10 11 12 **Data synthesis**

13  
14 All eligible studies will be summarised and analysed using Stata version 12 for  
15  
16 Windows. Two authors will extract the data, the first author will enter all data and  
17  
18 second author recheck all entries. Disagreements will be resolved by discussion.  
19  
20 If the studies are sufficiently similar, we will combine the data using random-  
21  
22 effects model due to anticipated heterogeneity that may result from the difference  
23  
24 in methodology and study settings. Where the rating scales used in the studies  
25  
26 have a reasonably large number of categories (more than 10) the data will be  
27  
28 treated as continuous variables arising from a normal distribution. We will use  
29  
30 weighted mean difference (WMD) when the pooled studies use the same rating  
31  
32 scale or test, and the standardised mean difference (SMD), the absolute mean  
33  
34 difference divided by the standard deviation when the studies use different rating  
35  
36 scales or tests. When the rating scales used are fewer than 10 and more than  
37  
38 two, we will concatenate the data into two categories that best represent the  
39  
40 contrasting states of interest, and treat the outcome measure as binary. Study  
41  
42 results for dichotomous data will be expressed as relative risk (RR) and 95%  
43  
44 confidence interval (CI). Time-to-event outcomes or generic inverse variance  
45  
46 outcomes, such as survival time and time to cure will be expressed as the log  
47  
48 hazards ratio and 95% CI.  
49  
50  
51  
52  
53  
54  
55  
56  
57  
58  
59  
60

1  
2  
3 When studies cannot be combined for meta-analysis due to diversity of  
4 interventions, narrative syntheses will be conducted and results of individual  
5 studies will be displayed graphically to enable more succinct summary of  
6 evidence.  
7  
8  
9  
10  
11  
12

### 13 **Unit of analysis**

14  
15 All cluster randomised trials that meet the inclusion criteria will be included in the  
16 meta-analysis after adjusting for design effect using variation inflation method  
17 [34, 35]: design effect =  $1 + (M - 1)ICC$ , where M is the average cluster size and  
18 ICC is the intra-cluster correlation coefficient. If the authors did not report the  
19 ICC, we will use ICC from a similar published trial. For estimated values of ICC,  
20 we will conduct sensitivity analyses using larger and smaller ICCs to determine if  
21 the results are robust.  
22  
23  
24  
25  
26  
27  
28  
29  
30  
31  
32  
33  
34  
35  
36

### 37 **Assessment of heterogeneity**

38 We anticipate substantial variation in study results due to differences in the study  
39 design, co-interventions, study settings (low-income versus lower-middle-income  
40 versus upper-middle-income countries), and risk of bias. We will examine  
41 statistical heterogeneity between study results using the Chi-squared test of  
42 homogeneity (with significance defined at the alpha-level of 10%), and quantify  
43 any statistical heterogeneity between study results using the I-squared statistic  
44 [30].  
45  
46  
47  
48  
49  
50  
51  
52  
53  
54  
55  
56  
57  
58  
59  
60

### **Assessment of reporting biases**

A funnel plot will be used to investigate the risk of publication bias by intervention type, provided 10 or more studies are included in the analysis for each intervention type [36, 37]. The funnel plot will be critically examined for asymmetry.

### **Sensitivity analysis**

We will conduct sensitivity analysis to establish if the meta-analysis results are influenced by: the effect of study designs; publication type (peer-reviewed versus grey literature) the geographical settings (low-income versus lower-middle-income versus upper-middle-income countries); and study period (published before 2000 versus published after 2000).

### **Discussion**

This systematic review will establish whether SIAs improves immunisation coverage, prevent disease outbreaks, and have negative impact on routine immunisation services in LMICs. The review will provide an up-to-date evidence base of the benefits and harms of the use of SIAs in the control of vaccine-preventable disease. Additionally, we will discuss how the findings of this review may be applicable in the context of future vaccines against TB, HIV and malaria.

## References:

1. WHO: **World TB Day, 24 March 2013**. <http://www.who.int/campaigns/tb-day/2013/event/en/>. Accessed on 1<sup>st</sup> October 2013.
2. Abu-Raddad LJ, Sabatelli L, Achterberg JT, Sugimoto JD, Longini IM, Jr., Dye C, Halloran ME: **Epidemiological benefits of more-effective tuberculosis vaccines, drugs, and diagnostics**. *Proc Natl Acad Sci U S A* 2009, **106**(33):13980-13985.
3. Brennan MJ, Stone MR, Evans T: **A rational vaccine pipeline for tuberculosis**. *Int J Tuberc Lung Dis* 2012, **16**(12):1566-1573.
4. Kaufmann SH, Hussey G, Lambert PH: **New vaccines for tuberculosis**. *Lancet* 2010, **375**(9731):2110-2119.
5. Machingaidze S, Wiysonge CS, Hussey GD: **Strengthening the expanded programme on immunization in Africa: looking beyond 2015**. *PLoS medicine* 2013, **10**(3):e1001405.
6. Tao W, Petzold M, Forsberg BC: **Routine vaccination coverage in low- and middle-income countries: further arguments for accelerating support to child vaccination services**. *Global health action* 2013, **6**:20343.
7. WHO: **Global Tuberculosis Report**. In.; 2012.
8. Weiss WM, Rahman MD, Solomon R, Ward D: **Determinants of performance of supplemental immunization activities for polio eradication in Uttar Pradesh, India: social mobilization activities of the Social mobilization Network (SM Net) and Core Group Polio Project (CGPP)**. *BMC Infect Dis* 2013, **13**:17.
9. Yang J, Acosta CJ, Si GA, Zeng J, Li CY, Liang DB, Ochiai RL, Page AL, Danovaro-Holliday MC, Zhang J *et al*: **A mass vaccination campaign targeting adults and children to prevent typhoid fever in Hechi; expanding the use of Vi polysaccharide vaccine in southeast China: a cluster-randomized trial**. *BMC Public Health* 2005, **5**:49.
10. Vijayaraghavan M, Martin RM, Sangrujee N, Kimani GN, Oyombe S, Kalu A, Runyago A, Wanjau G, Cairns L, Muchiri SN: **Measles supplemental immunization activities improve measles vaccine coverage and equity: Evidence from Kenya, 2002**. *Health Policy* 2007, **83**(1):27-36.
11. Otten M, Kezaala R, Fall A, Masresha B, Martin R, Cairns L, Eggers R, Biellik R, Grabowsky M, Strebel P *et al*: **Public-health impact of**



- 1  
2  
3 **accelerated measles control in the WHO African Region 2000-03.**  
4 *Lancet* 2005, **366**(9488):832-839.  
5  
6
- 7 12. Wiysonge CS, Nomo E, Mawo JN, Ticha JM: **Accelerated measles**  
8 **control in sub-Saharan Africa.** *Lancet* 2006, **367**(9508):394-395.  
9
- 10 13. Sutter RW, Maher C: **Mass vaccination campaigns for polio**  
11 **eradication: an essential strategy for success.** *Curr Top Micro* 2006,  
12 **304**:195-220.  
13
- 14 14. Brotherton JM, Fridman M, May CL, Chappell G, Saville AM, Gertig DM:  
15 **Early effect of the HPV vaccination programme on cervical**  
16 **abnormalities in Victoria, Australia: an ecological study.** *Lancet* 2011,  
17 **377**(9783):2085-2092.  
18
- 19 15. Schaetti C, Ali SM, Chaignat CL, Khatib AM, Hutubessy R, Weiss MG:  
20 **Improving community coverage of oral cholera mass vaccination**  
21 **campaigns: lessons learned in Zanzibar.** *PLoS One* 2012, **7**(7):e41527.  
22
- 23 16. Dietz V, Cutts F: **The use of mass campaigns in the expanded**  
24 **program on immunization: a review of reported advantages and**  
25 **disadvantages.** *Int J Health Serv* 1997, **27**(4):767-790.  
26
- 27 17. Mahomed H, Ehrlich R, Hawkridge T, Hatherill M, Geiter L, Kafaar F,  
28 Abrahams DA, Mulenga H, Tameris M, Geldenhuys H *et al*: **TB Incidence**  
29 **in an Adolescent Cohort in South Africa.** *PLoS One* 2013, **8**(3):e59652.  
30
- 31 18. Middelkoop K, Bekker LG, Liang H, Aquino LD, Sebastian E, Myer L,  
32 Wood R: **Force of tuberculosis infection among adolescents in a high**  
33 **HIV and TB prevalence community: a cross-sectional observation**  
34 **study.** *BMC Infect Dis* 2011, **11**:156.  
35
- 36 19. Hales S, de Wet N, Maindonald J, Woodward A: **Potential effect of**  
37 **population and climate changes on global distribution of dengue**  
38 **fever: an empirical model.** *Lancet* 2002, **360**(9336):830-834.  
39
- 40 20. Gushulak BD, MacPherson DW: **Globalization of infectious diseases:**  
41 **the impact of migration.** *Clin Infect Di* 2004, **38**(12):1742-1748.  
42
- 43 21. Gangarosa EJ, Galazka AM, Wolfe CR, Phillips LM, Gangarosa RE, Miller  
44 E, Chen RT: **Impact of anti-vaccine movements on pertussis control:**  
45 **the untold story.** *Lancet* 1998, **351**(9099):356-361.  
46
- 47 22. Pawinski R, Debrus S, Delem A, Smolenov I, Suryakiran PV, Han HH:  
48 **Rotarix in developing countries: paving the way for inclusion in**  
49  
50  
51  
52  
53  
54  
55  
56  
57  
58  
59  
60

- 1  
2  
3 **national childhood immunization programs in Africa.** *J Infect Dis*  
4 2010, **202 Suppl**:S80-86.  
5  
6  
7 23. Burchett HE, Mounier-Jack S, Griffiths UK, Biellik R, Ongolo-Zogo P,  
8 Chavez E, Sarma H, Uddin J, Konate M, Kitaw Y *et al*: **New vaccine**  
9 **adoption: qualitative study of national decision-making processes in**  
10 **seven low- and middle-income countries.** *Health Policy and Plann*  
11 2012, **27 Suppl 2**:ii5-16.  
12  
13  
14 24. Verguet S, Jassat W, Hedberg C, Tollman S, Jamison DT, Hofman KJ:  
15 **Measles control in Sub-Saharan Africa: South Africa as a case study.**  
16 *Vaccine* 2012, **30(9)**:1594-1600.  
17  
18  
19 25. Verguet S, Jassat W, Bertram MY, Tollman SM, Murray CJ, Jamison DT,  
20 Hofman KJ: **Impact of supplemental immunisation activity (SIA)**  
21 **campaigns on health systems: findings from South Africa.** *J*  
22 *Epidemiol and Commu H* 2013.  
23  
24  
25 26. De Wals P, De Serres G, Niyonsenga T: **Effectiveness of a mass**  
26 **immunization campaign against serogroup C meningococcal disease**  
27 **in Quebec.** *JAMA* 2001, **285(2)**:177-181.  
28  
29  
30 27. Wiysonge CS, Mawo JN, Ticha JM, Nomo E, Shey MS: **Migration and**  
31 **measles.** *Int J Epidemiol* 2005, **34(6)**:1443-1444.  
32  
33  
34 28. Uzicanin A, Zhou F, Eggers R, Webb E, Strebel P: **Economic analysis of**  
35 **the 1996-1997 mass measles immunization campaigns in South**  
36 **Africa.** *Vaccine* 2004, **22(25-26)**:3419-3426.  
37  
38  
39 29. Zuber PL, Conombo KS, Traore AD, Millogo JD, Ouattara A, Ouedraogo  
40 IB, Valian A: **Mass measles vaccination in urban Burkina Faso, 1998.**  
41 *B World Health Organ* 2001, **79(4)**:296-300.  
42  
43  
44 30. JPT H: **Cochrane Handbook for Systematic Reviews of Interventions**  
45 **Version 5.1.0** 2011.  
46  
47 31. **Methodology Checklists; Health Improvement Scotland**  
48 [<http://www.sign.ac.uk/methodology/checklists.html>]  
49  
50 32. Higgins JP, Thompson SG: **Quantifying heterogeneity in a meta-**  
51 **analysis.** *Stat Med* 2002, **21(11)**:1539-1558.  
52  
53  
54 33. Higgins JP, Thompson SG, Deeks JJ, Altman DG: **Measuring**  
55 **inconsistency in meta-analyses.** *BMJ* 2003, **327(7414)**:557-560.  
56  
57  
58  
59  
60

- 1  
2  
3  
4  
5  
6  
7  
8  
9  
10  
11  
12  
13  
14  
15  
16  
17  
18  
19  
20  
21  
22  
23  
24  
25  
26  
27  
28  
29  
30  
31  
32  
33  
34  
35  
36  
37  
38  
39  
40  
41  
42  
43  
44  
45  
46  
47  
48  
49  
50  
51  
52  
53  
54  
55  
56  
57  
58  
59  
60
34. JPT H, JJ D, DG A: **Special topics in statistics. The Cochrane Collaboration.** In., edn.; 2011.
35. Rao JN, Scott AJ: **A simple method for the analysis of clustered binary data.** *Biometrics* 1992, **48**(2):577-585.
36. Sterne JA, Egger M: **Funnel plots for detecting bias in meta-analysis: guidelines on choice of axis.** *J Clin Epidemiol* 2001, **54**(10):1046-1055.
37. Sterne JA, Sutton AJ, Ioannidis JP, Terrin N, Jones DR, Lau J, Carpenter J, Rucker G, Harbord RM, Schmid CH *et al*: **Recommendations for examining and interpreting funnel plot asymmetry in meta-analyses of randomised controlled trials.** *BMJ* 2011, **343**:d4002.

**Appendix 1: Proposed search strategy and search outputs for PubMed database**

|     | <b>Query</b>                                                                                                                                                                                                                                                                                                                                                                                                                                                                                                                                                                                                                                                                                                                                                                                                                                                                                                                                                                                                                                                                                                                                                                                                                                                                                                                                                                                                                       | <b>Output</b> |
|-----|------------------------------------------------------------------------------------------------------------------------------------------------------------------------------------------------------------------------------------------------------------------------------------------------------------------------------------------------------------------------------------------------------------------------------------------------------------------------------------------------------------------------------------------------------------------------------------------------------------------------------------------------------------------------------------------------------------------------------------------------------------------------------------------------------------------------------------------------------------------------------------------------------------------------------------------------------------------------------------------------------------------------------------------------------------------------------------------------------------------------------------------------------------------------------------------------------------------------------------------------------------------------------------------------------------------------------------------------------------------------------------------------------------------------------------|---------------|
| #10 | #9 AND #3                                                                                                                                                                                                                                                                                                                                                                                                                                                                                                                                                                                                                                                                                                                                                                                                                                                                                                                                                                                                                                                                                                                                                                                                                                                                                                                                                                                                                          | 3578          |
| #9  | #4 OR #5 OR #6 OR #7 OR #8                                                                                                                                                                                                                                                                                                                                                                                                                                                                                                                                                                                                                                                                                                                                                                                                                                                                                                                                                                                                                                                                                                                                                                                                                                                                                                                                                                                                         | 2374619       |
| #8  | developing countries[MeSH Terms]                                                                                                                                                                                                                                                                                                                                                                                                                                                                                                                                                                                                                                                                                                                                                                                                                                                                                                                                                                                                                                                                                                                                                                                                                                                                                                                                                                                                   | 60628         |
| #7  | (Low income country OR lower income country OR third world country OR middle income country)                                                                                                                                                                                                                                                                                                                                                                                                                                                                                                                                                                                                                                                                                                                                                                                                                                                                                                                                                                                                                                                                                                                                                                                                                                                                                                                                       | 101967        |
| #6  | (Angola OR Republic of Angola OR Albania OR Republic of Albania OR Algeria OR The People's Democratic Republic of Algeria OR American Samoa OR Argentina OR Azerbaijan OR Belarus OR Belize OR Bosnia and Herzegovina OR Bosnia-Herzegovina OR Bosnia OR Botswana OR Brazil OR Federative Republic of Brazil OR Bulgaria OR China OR People's Republic of China OR Colombia OR Costa Rica OR Fiji OR Gabon OR Gabonese Republic OR Grenada OR Hungary OR Islamic Republic of Iran OR Persia OR Iran OR Iraq OR Jamaica OR Jordan OR Hashemite Kingdom of Jordan OR Kazakhstan OR Lebanon OR Lebanese Republic OR Libya OR State of Libya OR Macedonia OR Republic of Macedonia OR Malaysia OR Maldives OR Republic of the Maldives OR Maldivian Islands OR Marshall Islands OR Republic of the Marshall Islands OR Palau OR Republic of Palau OR Panama OR Republic of Panama OR Peru OR Romania OR Serbia, OR the Republic of Serbia OR Seychelles OR the Republic of Seychelles OR South Africa OR Saint Lucia OR Saint Vincent and the Grenadines OR Suriname OR Thailand OR Kingdom of Thailand OR Tonga OR Kingdom of Tonga OR Tunisia OR Turkey OR Turkmenistan OR Turkmenia OR Cuba OR Dominica OR Commonwealth of Dominica OR The Dominican Republic OR Ecuador OR Mauritius OR Mexico OR United Mexican States OR Montenegro OR Namibia OR Tuvalu OR Ellice Islands OR Venezuela OR the Bolivarian Republic of Venezuela) | 1548458       |
| #5  | (Armenia OR armenia OR Bhutan OR Kingdom of Bhutan OR Bolivia OR Plurinational State of Bolivia                                                                                                                                                                                                                                                                                                                                                                                                                                                                                                                                                                                                                                                                                                                                                                                                                                                                                                                                                                                                                                                                                                                                                                                                                                                                                                                                    | 588621        |

|    |                                                                                                                                                                                                                                                                                                                                                                                                                                                                                                                                                                                                                                                                                                                                                                                                                                                                                                                                                                                                                                                                                                                                                                                                                                                                                                                                                                                                                                                                                                                                                                                                                                                                                                                                                                                                                                 |        |
|----|---------------------------------------------------------------------------------------------------------------------------------------------------------------------------------------------------------------------------------------------------------------------------------------------------------------------------------------------------------------------------------------------------------------------------------------------------------------------------------------------------------------------------------------------------------------------------------------------------------------------------------------------------------------------------------------------------------------------------------------------------------------------------------------------------------------------------------------------------------------------------------------------------------------------------------------------------------------------------------------------------------------------------------------------------------------------------------------------------------------------------------------------------------------------------------------------------------------------------------------------------------------------------------------------------------------------------------------------------------------------------------------------------------------------------------------------------------------------------------------------------------------------------------------------------------------------------------------------------------------------------------------------------------------------------------------------------------------------------------------------------------------------------------------------------------------------------------|--------|
|    | <p>OR Cameroon OR Republic of Cameroon OR Republic of Cameroun OR Cape Verde OR Republic of Cape Verde OR Cote D'ivoire OR Ivory Coast OR Republic of Cote D'ivoire OR Djibouti OR Republic of Djibouti OR Arab Republic of Egypt OR Egypt OR El Salvador OR Georgia OR Ghana OR Republic of Ghana OR Guatemala OR Republic of Guatemala OR Guyana OR Co-operative Republic of Guyana OR Honduras OR Republic of Honduras OR Spanish Honduras OR Republic of Indonesia OR Indonesia OR India OR Republic of India OR Kiribati OR Republic of Kiribati OR Kosovo OR Kosovo and Metohija OR Laos OR Lao Lao People's Democratic Republic OR Lesotho OR Kingdom of Lesotho OR Mauritania OR Islamic Republic of Mauritania OR Micronesia, Fed. Sts. OR Federated States of Micronesia OR FSM OR Moldova OR Republic of Moldova OR Mongolia OR Morocco OR Kingdom of Morocco OR Nicaragua OR Republic of Nicaragua OR Nigeria OR Federal Republic of Nigeria OR Pakistan OR Islamic Republic of Pakistan OR Papua New Guinea OR Independent State of Papua New Guinea OR Paraguay OR Republic of Paraguay OR Philippines OR Republic of the Philippines OR Samoa OR Independent State of Samoa OR Sao Tome and Principe OR Democratic Republic of Sao Tome and Principe OR Senegal OR Republic of Senegal OR Solomon Islands OR Sri Lanka OR Democratic Socialist Republic of Sri Lanka OR Sudan OR Republic of the Sudan OR North Sudan OR Swaziland OR Kingdom of Swaziland OR Ngwane OR Yuwatini OR Syrian Arab Republic OR Syria OR East Timor OR Timor-leste OR Democratic Republic of Timor-leste OR Ukraine OR Uzbekistan OR Republic of Uzbekistan OR Vanuatu OR Republic of Vanuatu OR Vietnam OR the Socialist Republic of Vietnam OR West bank and Gaza OR Yemen OR Yemeni Republic OR Zambia OR Republic of Zambia)</p> |        |
| #4 | <p>(Afghanistan OR Islamic Republic of Afghanistan OR Bangladesh OR People's Republic of Bangladesh OR Benin OR Dahomey OR Republic of Benin OR Burkina Faso OR Burkina OR Republic of Upper Volta OR Burundi OR Republic of Burundi OR Cambodia OR Kingdom of</p>                                                                                                                                                                                                                                                                                                                                                                                                                                                                                                                                                                                                                                                                                                                                                                                                                                                                                                                                                                                                                                                                                                                                                                                                                                                                                                                                                                                                                                                                                                                                                              | 281200 |

|    |                                                                                                                                                                                                                                                                                                                                                                                                                                                                                                                                                                                                                                                                                                                                                                                                                                                                                                                                                                                                                                                                                                                                                                                                                                                                                                                           |       |
|----|---------------------------------------------------------------------------------------------------------------------------------------------------------------------------------------------------------------------------------------------------------------------------------------------------------------------------------------------------------------------------------------------------------------------------------------------------------------------------------------------------------------------------------------------------------------------------------------------------------------------------------------------------------------------------------------------------------------------------------------------------------------------------------------------------------------------------------------------------------------------------------------------------------------------------------------------------------------------------------------------------------------------------------------------------------------------------------------------------------------------------------------------------------------------------------------------------------------------------------------------------------------------------------------------------------------------------|-------|
|    | Cambodia OR Central African Republic OR Chad OR Republic of Chad OR Comoros OR Union of the Comoros OR Democratic Republic of the Congo OR DR Congo OR Congo-Kinshasa OR DRC OR Zaire OR Eritrea OR State of Eritrea OR Ethiopia OR Federal Democratic Republic of Ethiopia OR The Gambia OR Republic of the Gambia OR Guinea OR Republic of Guinea OR Guinea-Conakry OR Guinea-Bissau OR Republic of Guinea-Bissau OR Haiti OR Republic of Haiti OR Kenya OR Republic of Kenya OR North Korea OR Democratic People's Republic of Korea OR Kyrgyz Republic OR Kyrgyzstan OR Liberia OR Republic of Liberia OR Madagascar OR Republic of Madagascar OR Malawi OR Republic of Malawi OR The Warm Heart of Africa OR Mali OR Republic of Mali OR Mozambique OR Republic of Mozambique OR Myanmar OR Burma OR Republic of the Union of Myanmar OR Nepal OR Democratic Republic of Nepal OR Niger OR Republic of Niger OR Rwanda OR Republic of Rwanda OR Sierra Leone OR Republic of Sierra Leone OR Somalia OR Federal Republic of Somalia OR South Sudan OR Republic of South Sudan OR Tajikistan OR Republic of Tajikistan OR Tanzania OR United Republic of Tanzania OR Republic of Tanganyika and Zanzibar OR Togo OR Togolese Republic OR Uganda OR Republic of Uganda OR Zimbabwe OR Republic of Zimbabwe OR Rhodesia) |       |
| #3 | #1 OR #2                                                                                                                                                                                                                                                                                                                                                                                                                                                                                                                                                                                                                                                                                                                                                                                                                                                                                                                                                                                                                                                                                                                                                                                                                                                                                                                  | 10894 |
| #2 | (Mass immunization OR mass immunisation OR supplemental immunization OR supplemental immunisation OR supplementary immunization OR supplementary immunisation OR mass campaigns OR immunisation campaigns OR vaccination campaigns OR immunization campaigns)                                                                                                                                                                                                                                                                                                                                                                                                                                                                                                                                                                                                                                                                                                                                                                                                                                                                                                                                                                                                                                                             | 10894 |
| #1 | "mass vaccination"[MeSH Terms]                                                                                                                                                                                                                                                                                                                                                                                                                                                                                                                                                                                                                                                                                                                                                                                                                                                                                                                                                                                                                                                                                                                                                                                                                                                                                            | 1913  |

**Appendix 2: Summary of the search outputs retrieved from different databases using the proposed search strategy**

| <b>Name of the database</b>                              | <b>Number of search outputs retrieved</b> | <b>Status of the search process</b> |
|----------------------------------------------------------|-------------------------------------------|-------------------------------------|
| Pubmed                                                   | 3578                                      | Completed                           |
| Web of Science                                           | 1746                                      | Completed                           |
| Cochrane Central Register of Controlled trials (CENTRAL) | 281                                       | Completed                           |
| Scopus                                                   | 2914                                      | Completed                           |
| Africa Wide                                              | 1042                                      | Completed                           |
| PDQ-Evidence                                             | 157                                       | Completed                           |
| WHOLIS                                                   | 14                                        | Completed                           |
| CINAHL                                                   | 194                                       | Completed                           |

### Appendix 3: Proposed data extraction form

#### 1) Details of person extracting the data

|                                        | Description | Comments |
|----------------------------------------|-------------|----------|
| Name of researcher completing the form |             |          |
| Date when form completed (dd/mm/yyyy)  |             |          |

#### 2) General information

| Description of the study                                                     | Enter as appearing in the publication                                                                                                                                                                                       | Reference page/table or figure in the study |
|------------------------------------------------------------------------------|-----------------------------------------------------------------------------------------------------------------------------------------------------------------------------------------------------------------------------|---------------------------------------------|
| Study ID based on surname of first author and year (e.g <i>Hussey 2001</i> ) |                                                                                                                                                                                                                             |                                             |
| Study reference                                                              |                                                                                                                                                                                                                             |                                             |
| Correspondence author and the contact details:                               |                                                                                                                                                                                                                             |                                             |
| Publication type                                                             | <input type="checkbox"/> Full text <input type="checkbox"/> Abstract<br><input type="checkbox"/> Governmental or chapter non-governmental reports <input type="checkbox"/> Book<br><input type="checkbox"/> Other (specify) |                                             |
| Source of funding and cost of SIA per participant                            |                                                                                                                                                                                                                             |                                             |
| References of potentially eligible studies from the reference list           |                                                                                                                                                                                                                             |                                             |



|                       |  |
|-----------------------|--|
| <b>Notes/Comments</b> |  |
|-----------------------|--|

### 3) Study eligibility assessment

| <b>Characteristics</b>                                                  | <b>Tick or describe as appropriate</b>                                                                                                                                    | <b>Reference page/table or figure in article</b> |
|-------------------------------------------------------------------------|---------------------------------------------------------------------------------------------------------------------------------------------------------------------------|--------------------------------------------------|
| <b>Primary study</b>                                                    | <input type="checkbox"/> Yes (Primary) <span style="margin-left: 200px;"><input type="checkbox"/> No</span>                                                               |                                                  |
| <b>Type of study design</b>                                             |                                                                                                                                                                           |                                                  |
| <b>Unit of allocation to the intervention</b><br><i>(if applicable)</i> | <input type="checkbox"/> Individual<br><input type="checkbox"/> Household<br><input type="checkbox"/> Cluster<br><input type="checkbox"/> Other (Specify)                 |                                                  |
| <b>Informed consent obtained for study</b><br><i>(if applicable)</i>    | <input type="checkbox"/> Yes <span style="margin-left: 50px;"><input type="checkbox"/> No</span> <span style="margin-left: 50px;"><input type="checkbox"/> Unclear</span> |                                                  |
| <b>Ethical approval obtained for study</b><br><i>(if applicable)</i>    | <input type="checkbox"/> Yes <span style="margin-left: 50px;"><input type="checkbox"/> No</span> <span style="margin-left: 50px;"><input type="checkbox"/> Unclear</span> |                                                  |
| <b>SIAs conducted in LMIC</b>                                           | <input type="checkbox"/> Yes <span style="margin-left: 200px;"><input type="checkbox"/> No</span>                                                                         |                                                  |
| <b>If yes, category of country or countries</b>                         | <input type="checkbox"/> Low-income country<br><input type="checkbox"/> Lower middle-income country<br><input type="checkbox"/> Upper middle-income country               |                                                  |
| <b>Name of the country</b>                                              |                                                                                                                                                                           |                                                  |

|                                                                                                                                        |                                            |                                                                                                                                                                                                                                                                                                                                                                  |                                          |  |
|----------------------------------------------------------------------------------------------------------------------------------------|--------------------------------------------|------------------------------------------------------------------------------------------------------------------------------------------------------------------------------------------------------------------------------------------------------------------------------------------------------------------------------------------------------------------|------------------------------------------|--|
| 1<br>2<br>3<br>4<br>5<br>6<br>7<br>8<br>9                                                                                              | <b>Study describes SIAs</b>                | <input type="checkbox"/> Yes                                                                                                                                                                                                                                                                                                                                     | <input type="checkbox"/> No              |  |
| 10<br>11<br>12<br>13<br>14                                                                                                             | <b>Name of vaccine used in the SIAs</b>    |                                                                                                                                                                                                                                                                                                                                                                  |                                          |  |
| 15<br>16<br>17<br>18<br>19<br>20<br>21<br>22<br>23<br>24<br>25<br>26<br>27<br>28<br>29<br>30<br>31<br>32<br>33<br>34<br>35<br>36<br>37 | <b>Disease targeted by the SIAs</b>        |                                                                                                                                                                                                                                                                                                                                                                  |                                          |  |
| 38<br>39<br>40<br>41<br>42<br>43<br>44                                                                                                 | <b>Outcome measures</b>                    | <input type="checkbox"/> Yes<br>Vaccination coverage attained by the SIAs<br><br><input type="checkbox"/> Yes<br>Disease outbreaks<br><br><input type="checkbox"/> Yes<br>Disease incidence<br><br><input type="checkbox"/> Yes<br>Routine immunization coverage after SIAs)<br><br><input type="checkbox"/> Other (specify):<br><br><input type="checkbox"/> No |                                          |  |
| 45<br>46<br>47<br>48<br>49<br>50<br>51<br>52<br>53<br>54<br>55<br>56<br>57<br>58<br>59<br>60                                           | <b>Final decision on study eligibility</b> | <input type="checkbox"/> Yes<br>(Include)                                                                                                                                                                                                                                                                                                                        | <input type="checkbox"/> No<br>(Exclude) |  |
|                                                                                                                                        | <b>Reason(s) for exclusion</b>             |                                                                                                                                                                                                                                                                                                                                                                  |                                          |  |

**NB: Do not proceed to the next step if the study is excluded from the review**

#### 4) Study aims and methods

|               | <b>Describe as stated in report/paper/book chapter</b> | <b>Reference page/table or figure in the study</b> |
|---------------|--------------------------------------------------------|----------------------------------------------------|
| <b>Aim(s)</b> |                                                        |                                                    |

|                                                                                                                                              |                                                                                                                                                                                                       |                                                                                                                                                                                                                                                                                                                              |  |
|----------------------------------------------------------------------------------------------------------------------------------------------|-------------------------------------------------------------------------------------------------------------------------------------------------------------------------------------------------------|------------------------------------------------------------------------------------------------------------------------------------------------------------------------------------------------------------------------------------------------------------------------------------------------------------------------------|--|
| 1<br>2<br>3<br>4<br>5<br>6                                                                                                                   | <b>Methods to estimate target population for SIAs</b>                                                                                                                                                 |                                                                                                                                                                                                                                                                                                                              |  |
| 7<br>8<br>9                                                                                                                                  | <b>Methods to estimate SIAs coverage</b>                                                                                                                                                              |                                                                                                                                                                                                                                                                                                                              |  |
| 10<br>11<br>12<br>13                                                                                                                         | <b>Period between SIAs and coverage survey (if applicable)</b>                                                                                                                                        |                                                                                                                                                                                                                                                                                                                              |  |
| 14<br>15<br>16                                                                                                                               | <b>SIAs start date</b>                                                                                                                                                                                |                                                                                                                                                                                                                                                                                                                              |  |
| 17<br>18<br>19<br>20<br>21<br>22<br>23<br>24<br>25<br>26                                                                                     | <b>SIAs end date</b><br><br><i>(NB: If SIAs were conducted in more than one phase, duplicate the two rows as appropriate).</i>                                                                        |                                                                                                                                                                                                                                                                                                                              |  |
| 27<br>28<br>29<br>30<br>31<br>32<br>33<br>34<br>35<br>36                                                                                     | <b>Total duration of the SIAs (in days)</b><br><br><i>(NB: If SIAs were conducted in more than one phase, duplicate this row as appropriate).</i>                                                     |                                                                                                                                                                                                                                                                                                                              |  |
| 37<br>38<br>39<br>40<br>41<br>42<br>43<br>44<br>45<br>46<br>47<br>48<br>49<br>50<br>51<br>52<br>53<br>54<br>55<br>56<br>57<br>58<br>59<br>60 | <b>Means of communicating the information about the SIAs to the target population (phase 1)</b><br><br><i>(NB: If SIAs were conducted in more than one phase, duplicate this row as appropriate).</i> | <input type="checkbox"/> Healthcare facility<br><br><input type="checkbox"/> Door to door<br><br><input type="checkbox"/> Word of mouth<br><br><input type="checkbox"/> Mass media (radio, TV etc)<br><br><input type="checkbox"/> Digital media (text message, emails etc)<br><br><input type="checkbox"/> Other (specify): |  |

|                                                                                      |                                                                                                                                                                    |  |
|--------------------------------------------------------------------------------------|--------------------------------------------------------------------------------------------------------------------------------------------------------------------|--|
| <b>Potential interference of SIA with routine immunization services investigated</b> | <input type="checkbox"/> Yes (explain):<br><br><input type="checkbox"/> No                                                                                         |  |
| <b>Personnel performing the vaccinations during the SIAs</b>                         | <input type="checkbox"/> Doctors<br><br><input type="checkbox"/> Nurses<br><br><input type="checkbox"/> Volunteers<br><br><input type="checkbox"/> Other (specify) |  |
| <b>Number of personnel performing the vaccinations during the SIAs (if provided)</b> |                                                                                                                                                                    |  |
| Notes:                                                                               |                                                                                                                                                                    |  |

### 5) Participants

| Characteristics                                                                          | Description                                                                                                                                                                                         | Reference page/table or figure in the study |
|------------------------------------------------------------------------------------------|-----------------------------------------------------------------------------------------------------------------------------------------------------------------------------------------------------|---------------------------------------------|
| <b>SIA setting</b>                                                                       | <input type="checkbox"/> Rural community <input type="checkbox"/> Urban <input type="checkbox"/> Displaced<br><br><input type="checkbox"/> Other (specify)                                          |                                             |
| <b>Socio-economic status of the target population relative to the general population</b> | <input type="checkbox"/> Low (L) (AA) <input type="checkbox"/> Average (A) <input type="checkbox"/> Above average<br><br><input type="checkbox"/> All (L, A &AA) <input type="checkbox"/> Not clear |                                             |

|                                           |                                                                                         |                                                                                             |  |
|-------------------------------------------|-----------------------------------------------------------------------------------------|---------------------------------------------------------------------------------------------|--|
| 1<br>2<br>3<br>4<br>5<br>6<br>7<br>8<br>9 | <b>Methods used to classify the socio-economic status of the SIAs target population</b> |                                                                                             |  |
| 10<br>11<br>12<br>13<br>14                | <b>Total number of participants enrolled for the SIAs</b>                               |                                                                                             |  |
| 15<br>16<br>17                            | <b>Age</b>                                                                              |                                                                                             |  |
| 18<br>19<br>20<br>21                      | <b>Gender</b>                                                                           | <input type="checkbox"/> Female <input type="checkbox"/> Male <input type="checkbox"/> Both |  |
| 22<br>23<br>24<br>25<br>26<br>27          | <b>Notes (provide any other relevant information on the participants):</b>              |                                                                                             |  |

## 6) Outcome measures

| Details of the outcome                                                                                                                             | Characteristics of the outcomes |   |   |       | Reference page/table or figure in the study |
|----------------------------------------------------------------------------------------------------------------------------------------------------|---------------------------------|---|---|-------|---------------------------------------------|
|                                                                                                                                                    |                                 | F | M | Total |                                             |
| <b>Participants vaccinated during the SIAs period</b><br><br><i>(NB: If SIAs were conducted in more than one phase, duplicate as appropriate).</i> | Targeted                        |   |   |       |                                             |
|                                                                                                                                                    | Vaccinated                      |   |   |       |                                             |
|                                                                                                                                                    | Coverage attained               |   |   |       |                                             |
| <b>Routine immunization</b>                                                                                                                        | Before:                         |   |   |       |                                             |

|                                                                                                                                                  |                |  |
|--------------------------------------------------------------------------------------------------------------------------------------------------|----------------|--|
| <p>coverage before and after SIAs (NB: If SIAs were conducted in more than one phase, duplicate this row as appropriate).</p>                    | <p>After:</p>  |  |
| <p>Incidence of target disease before and after SIAs (NB: If SIAs were conducted in more than one phase, duplicate this row as appropriate).</p> | <p>Before:</p> |  |
| <p>Incidence of target disease before and after SIAs (NB: If SIAs were conducted in more than one phase, duplicate this row as appropriate).</p> | <p>After:</p>  |  |
| <p>Percentage reduction or increase in the routine immunization coverage (NB: specify increase or decrease)</p>                                  |                |  |
| <p>Notes:</p>                                                                                                                                    |                |  |

### 7) Risk of bias assessment

| Type of bias                            | Tick appropriately and describe below after the tick.                                                  | Reference page/table or figure in the study |
|-----------------------------------------|--------------------------------------------------------------------------------------------------------|---------------------------------------------|
| <p>Is there selection bias? (Assess</p> | <p><input type="checkbox"/> Yes    <input type="checkbox"/> No    <input type="checkbox"/> Unclear</p> |                                             |

|                                                                                                                                                                                                                           |                                                                                           |  |
|---------------------------------------------------------------------------------------------------------------------------------------------------------------------------------------------------------------------------|-------------------------------------------------------------------------------------------|--|
| <p><b>comparability of groups at baseline, confounding and adjustment. For RCTs assess sequence generation and allocation concealment).</b></p>                                                                           |                                                                                           |  |
| <p><b>Is there performance bias? (Assess fidelity of the interventions, and quality of the information regarding who received which interventions, including blinding of study subjects and healthcare providers)</b></p> | <input type="checkbox"/> Yes <input type="checkbox"/> No <input type="checkbox"/> Unclear |  |
| <p><b>Is there detection bias? (Assess whether there was biased and correct appraisal of outcomes, including blinding of assessors)</b></p>                                                                               | <input type="checkbox"/> Yes <input type="checkbox"/> No <input type="checkbox"/> Unclear |  |
| <p><b>Is there attrition bias? (Assess the completeness of sample, follow-up and outcome data, reasons for loss to follow up explained)</b></p>                                                                           | <input type="checkbox"/> Yes <input type="checkbox"/> No <input type="checkbox"/> Unclear |  |
| <p><b>Is there reporting bias (Assess selective reporting of results)</b></p>                                                                                                                                             | <input type="checkbox"/> Yes <input type="checkbox"/> No <input type="checkbox"/> Unclear |  |
| <p><b>Other biases (specify)</b></p>                                                                                                                                                                                      | <input type="checkbox"/> Yes <input type="checkbox"/> No <input type="checkbox"/> Unclear |  |

### 8) Other relevant information

|                                         | <b>Descriptions/figures as stated in report/paper/book chapter</b> | <b>Reference page/table or figure in the study</b> |
|-----------------------------------------|--------------------------------------------------------------------|----------------------------------------------------|
| <b>Key conclusions from the authors</b> |                                                                    |                                                    |

1  
2  
3  
4  
5  
6  
7  
8  
9  
10  
11  
12  
13  
14  
15  
16  
17  
18  
19  
20  
21  
22  
23  
24  
25  
26  
27  
28  
29  
30  
31  
32  
33  
34  
35  
36  
37  
38  
39  
40  
41  
42  
43  
44  
45  
46  
47  
48  
49  
50  
51  
52  
53  
54  
55  
56  
57  
58  
59  
60

|              |  |  |
|--------------|--|--|
| <b>Notes</b> |  |  |
|--------------|--|--|

For peer review only



## Appendix 1: Proposed search strategy and search outputs for PubMed database

|     | Query                                                                                                                                                                                                                                                                                                                                                                                                                                                                                                                                                                                                                                                                                                                                                                                                                                                                                                                                                                                                                                                                                                                                                                                                                                                                                                                                                                                                                              | Output  |
|-----|------------------------------------------------------------------------------------------------------------------------------------------------------------------------------------------------------------------------------------------------------------------------------------------------------------------------------------------------------------------------------------------------------------------------------------------------------------------------------------------------------------------------------------------------------------------------------------------------------------------------------------------------------------------------------------------------------------------------------------------------------------------------------------------------------------------------------------------------------------------------------------------------------------------------------------------------------------------------------------------------------------------------------------------------------------------------------------------------------------------------------------------------------------------------------------------------------------------------------------------------------------------------------------------------------------------------------------------------------------------------------------------------------------------------------------|---------|
| #10 | #9 AND #3                                                                                                                                                                                                                                                                                                                                                                                                                                                                                                                                                                                                                                                                                                                                                                                                                                                                                                                                                                                                                                                                                                                                                                                                                                                                                                                                                                                                                          | 3578    |
| #9  | #4 OR #5 OR #6 OR #7 OR #8                                                                                                                                                                                                                                                                                                                                                                                                                                                                                                                                                                                                                                                                                                                                                                                                                                                                                                                                                                                                                                                                                                                                                                                                                                                                                                                                                                                                         | 2374619 |
| #8  | developing countries[MeSH Terms]                                                                                                                                                                                                                                                                                                                                                                                                                                                                                                                                                                                                                                                                                                                                                                                                                                                                                                                                                                                                                                                                                                                                                                                                                                                                                                                                                                                                   | 60628   |
| #7  | (Low income country OR lower income country OR third world country OR middle income country)                                                                                                                                                                                                                                                                                                                                                                                                                                                                                                                                                                                                                                                                                                                                                                                                                                                                                                                                                                                                                                                                                                                                                                                                                                                                                                                                       | 101967  |
| #6  | (Angola OR Republic of Angola OR Albania OR Republic of Albania OR Algeria OR The People's Democratic Republic of Algeria OR American Samoa OR Argentina OR Azerbaijan OR Belarus OR Belize OR Bosnia and Herzegovina OR Bosnia-Herzegovina OR Bosnia OR Botswana OR Brazil OR Federative Republic of Brazil OR Bulgaria OR China OR People's Republic of China OR Colombia OR Costa Rica OR Fiji OR Gabon OR Gabonese Republic OR Grenada OR Hungary OR Islamic Republic of Iran OR Persia OR Iran OR Iraq OR Jamaica OR Jordan OR Hashemite Kingdom of Jordan OR Kazakhstan OR Lebanon OR Lebanese Republic OR Libya OR State of Libya OR Macedonia OR Republic of Macedonia OR Malaysia OR Maldives OR Republic of the Maldives OR Maldivian Islands OR Marshall Islands OR Republic of the Marshall Islands OR Palau OR Republic of Palau OR Panama OR Republic of Panama OR Peru OR Romania OR Serbia, OR the Republic of Serbia OR Seychelles OR the Republic of Seychelles OR South Africa OR Saint Lucia OR Saint Vincent and the Grenadines OR Suriname OR Thailand OR Kingdom of Thailand OR Tonga OR Kingdom of Tonga OR Tunisia OR Turkey OR Turkmenistan OR Turkmenia OR Cuba OR Dominica OR Commonwealth of Dominica OR The Dominican Republic OR Ecuador OR Mauritius OR Mexico OR United Mexican States OR Montenegro OR Namibia OR Tuvalu OR Ellice Islands OR Venezuela OR the Bolivarian Republic of Venezuela) | 1548458 |
| #5  | (Armenia OR armenia OR Bhutan OR Kingdom of Bhutan OR Bolivia OR Plurinational State of Bolivia OR Cameroon OR Republic of Cameroon OR Republic of Cameroun OR Cape Verde OR                                                                                                                                                                                                                                                                                                                                                                                                                                                                                                                                                                                                                                                                                                                                                                                                                                                                                                                                                                                                                                                                                                                                                                                                                                                       | 588621  |

|    |                                                                                                                                                                                                                                                                                                                                                                                                                                                                                                                                                                                                                                                                                                                                                                                                                                                                                                                                                                                                                                                                                                                                                                                                                                                                                                                                                                                                                                                                                                                                                                                                                                                                                                                                                    |        |
|----|----------------------------------------------------------------------------------------------------------------------------------------------------------------------------------------------------------------------------------------------------------------------------------------------------------------------------------------------------------------------------------------------------------------------------------------------------------------------------------------------------------------------------------------------------------------------------------------------------------------------------------------------------------------------------------------------------------------------------------------------------------------------------------------------------------------------------------------------------------------------------------------------------------------------------------------------------------------------------------------------------------------------------------------------------------------------------------------------------------------------------------------------------------------------------------------------------------------------------------------------------------------------------------------------------------------------------------------------------------------------------------------------------------------------------------------------------------------------------------------------------------------------------------------------------------------------------------------------------------------------------------------------------------------------------------------------------------------------------------------------------|--------|
|    | <p>Republic of Cape Verde OR Cote D'ivoire OR Ivory Coast OR Republic of Cote D'ivoire OR Djibouti OR Republic of Djibouti OR Arab Republic of Egypt OR Egypt OR El Salvador OR Georgia OR Ghana OR Republic of Ghana OR Guatemala OR Republic of Guatemala OR Guyana OR Co-operative Republic of Guyana OR Honduras OR Republic of Honduras OR Spanish Honduras OR Republic of Indonesia OR Indonesia OR India OR Republic of India OR Kiribati OR Republic of Kiribati OR Kosovo OR Kosovo and Metohija OR Laos OR Lao Lao People's Democratic Republic OR Lesotho OR Kingdom of Lesotho OR Mauritania OR Islamic Republic of Mauritania OR Micronesia, Fed. Sts. OR Federated States of Micronesia OR FSM OR Moldova OR Republic of Moldova OR Mongolia OR Morocco OR Kingdom of Morocco OR Nicaragua OR Republic of Nicaragua OR Nigeria OR Federal Republic of Nigeria OR Pakistan OR Islamic Republic of Pakistan OR Papua New Guinea OR Independent State of Papua New Guinea OR Paraguay OR Republic of Paraguay OR Philippines OR Republic of the Philippines OR Samoa OR Independent State of Samoa OR Sao Tome and Principe OR Democratic Republic of Sao Tome and Principe OR Senegal OR Republic of Senegal OR Solomon Islands OR Sri Lanka OR Democratic Socialist Republic of Sri Lanka OR Sudan OR Republic of the Sudan OR North Sudan OR Swaziland OR Kingdom of Swaziland OR Ngwane OR Yuwatini OR Syrian Arab Republic OR Syria OR East Timor OR Timor-leste OR Democratic Republic of Timor-leste OR Ukraine OR Uzbekistan OR Republic of Uzbekistan OR Vanuatu OR Republic of Vanuatu OR Vietnam OR the Socialist Republic of Vietnam OR West bank and Gaza OR Yemen OR Yemeni Republic OR Zambia OR Republic of Zambia)</p> |        |
| #4 | <p>(Afghanistan OR Islamic Republic of Afghanistan OR Bangladesh OR People's Republic of Bangladesh OR Benin OR Dahomey OR Republic of Benin OR Burkina Faso OR Burkina OR Republic of Upper Volta OR Burundi OR Republic of Burundi OR Cambodia OR Kingdom of Cambodia OR Central African Republic OR Chad OR Republic of Chad OR Comoros OR Union of</p>                                                                                                                                                                                                                                                                                                                                                                                                                                                                                                                                                                                                                                                                                                                                                                                                                                                                                                                                                                                                                                                                                                                                                                                                                                                                                                                                                                                         | 281200 |

|    |                                                                                                                                                                                                                                                                                                                                                                                                                                                                                                                                                                                                                                                                                                                                                                                                                                                                                                                                                                                                                                                                                                                                                                                                                                   |       |
|----|-----------------------------------------------------------------------------------------------------------------------------------------------------------------------------------------------------------------------------------------------------------------------------------------------------------------------------------------------------------------------------------------------------------------------------------------------------------------------------------------------------------------------------------------------------------------------------------------------------------------------------------------------------------------------------------------------------------------------------------------------------------------------------------------------------------------------------------------------------------------------------------------------------------------------------------------------------------------------------------------------------------------------------------------------------------------------------------------------------------------------------------------------------------------------------------------------------------------------------------|-------|
|    | the Comoros OR Democratic Republic of the Congo OR DR Congo OR Congo-Kinshasa OR DRC OR Zaire OR Eritrea OR State of Eritrea OR Ethiopia OR Federal Democratic Republic of Ethiopia OR The Gambia OR Republic of the Gambia OR Guinea OR Republic of Guinea OR Guinea-Conakry OR Guinea-Bissau OR Republic of Guinea-Bissau OR Haiti OR Republic of Haiti OR Kenya OR Republic of Kenya OR North Korea OR Democratic People's Republic of Korea OR Kyrgyz Republic OR Kyrgyzstan OR Liberia OR Republic of Liberia OR Madagascar OR Republic of Madagascar OR Malawi OR Republic of Malawi OR The Warm Heart of Africa OR Mali OR Republic of Mali OR Mozambique OR Republic of Mozambique OR Myanmar OR Burma OR Republic of the Union of Myanmar OR Nepal OR Democratic Republic of Nepal OR Niger OR Republic of Niger OR Rwanda OR Republic of Rwanda OR Sierra Leone OR Republic of Sierra Leone OR Somalia OR Federal Republic of Somalia OR South Sudan OR Republic of South Sudan OR Tajikistan OR Republic of Tajikistan OR Tanzania OR United Republic of Tanzania OR Republic of Tanganyika and Zanzibar OR Togo OR Togolese Republic OR Uganda OR Republic of Uganda OR Zimbabwe OR Republic of Zimbabwe OR Rhodesia) |       |
| #3 | #1 OR #2                                                                                                                                                                                                                                                                                                                                                                                                                                                                                                                                                                                                                                                                                                                                                                                                                                                                                                                                                                                                                                                                                                                                                                                                                          | 10894 |
| #2 | (Mass immunization OR mass immunisation OR supplemental immunization OR supplemental immunisation OR supplementary immunization OR supplementary immunisation OR mass campaigns OR immunisation campaigns OR vaccination campaigns OR immunization campaigns)                                                                                                                                                                                                                                                                                                                                                                                                                                                                                                                                                                                                                                                                                                                                                                                                                                                                                                                                                                     | 10894 |
| #1 | "mass vaccination"[MeSH Terms]                                                                                                                                                                                                                                                                                                                                                                                                                                                                                                                                                                                                                                                                                                                                                                                                                                                                                                                                                                                                                                                                                                                                                                                                    | 1913  |

**Appendix 2: Summary of the search outputs retrieved from different databases using the proposed search strategy**

| <b>Name of the database</b>                              | <b>Number of search outputs retrieved</b> | <b>Status of the search process</b> |
|----------------------------------------------------------|-------------------------------------------|-------------------------------------|
| Pubmed                                                   | 3578                                      | Completed                           |
| Web of Science                                           | 1746                                      | Completed                           |
| Cochrane Central Register of Controlled trials (CENTRAL) | 281                                       | Completed                           |
| Scopus                                                   | 2914                                      | Completed                           |
| Africa Wide                                              | 1042                                      | Completed                           |
| PDQ-Evidence                                             | 157                                       | Completed                           |
| WHOLIS                                                   | 14                                        | Completed                           |
| CINAHL                                                   | 194                                       | Completed                           |

### Appendix 3: Proposed data extraction form

#### 1) Details of person extracting the data

|                                        | Description | Comments |
|----------------------------------------|-------------|----------|
| Name of researcher completing the form |             |          |
| Date when form completed (dd/mm/yyyy)  |             |          |

#### 2) General information

| Description of the study                                                     | Enter as appearing in the publication                                                                                                                                                                                       | Reference page/table or figure in the study |
|------------------------------------------------------------------------------|-----------------------------------------------------------------------------------------------------------------------------------------------------------------------------------------------------------------------------|---------------------------------------------|
| Study ID based on surname of first author and year (e.g <i>Hussey 2001</i> ) |                                                                                                                                                                                                                             |                                             |
| Study reference                                                              |                                                                                                                                                                                                                             |                                             |
| Correspondence author and the contact details:                               |                                                                                                                                                                                                                             |                                             |
| Publication type                                                             | <input type="checkbox"/> Full text <input type="checkbox"/> Abstract<br><input type="checkbox"/> Governmental or chapter non-governmental reports <input type="checkbox"/> Book<br><input type="checkbox"/> Other (specify) |                                             |
| Source of funding and cost of SIA per participant                            |                                                                                                                                                                                                                             |                                             |
| References of potentially eligible studies from the reference list           |                                                                                                                                                                                                                             |                                             |
| Notes/Comments                                                               |                                                                                                                                                                                                                             |                                             |

## 3) Study eligibility assessment

| Characteristics                                                  | Tick or describe as appropriate                                                                                                                             | Reference page/table or figure in article |
|------------------------------------------------------------------|-------------------------------------------------------------------------------------------------------------------------------------------------------------|-------------------------------------------|
| Primary study                                                    | <input type="checkbox"/> Yes (Primary) <input type="checkbox"/> No                                                                                          |                                           |
| Type of study design                                             |                                                                                                                                                             |                                           |
| Unit of allocation to the intervention<br><i>(if applicable)</i> | <input type="checkbox"/> Individual<br><input type="checkbox"/> Household<br><input type="checkbox"/> Cluster<br><input type="checkbox"/> Other (Specify)   |                                           |
| Informed consent obtained for study<br><i>(if applicable)</i>    | <input type="checkbox"/> Yes <input type="checkbox"/> No <input type="checkbox"/> Unclear                                                                   |                                           |
| Ethical approval obtained for study<br><i>(if applicable)</i>    | <input type="checkbox"/> Yes <input type="checkbox"/> No <input type="checkbox"/> Unclear                                                                   |                                           |
| SIAs conducted in LMIC                                           | <input type="checkbox"/> Yes <input type="checkbox"/> No                                                                                                    |                                           |
| If yes, category of country or countries                         | <input type="checkbox"/> Low-income country<br><input type="checkbox"/> Lower middle-income country<br><input type="checkbox"/> Upper middle-income country |                                           |
| Name of the country                                              |                                                                                                                                                             |                                           |
| Study describes SIAs                                             | <input type="checkbox"/> Yes <input type="checkbox"/> No                                                                                                    |                                           |

|                                            |                                                                                                                                                                                                                                                                                                                                                                  |  |
|--------------------------------------------|------------------------------------------------------------------------------------------------------------------------------------------------------------------------------------------------------------------------------------------------------------------------------------------------------------------------------------------------------------------|--|
| <b>Name of vaccine used in the SIAs</b>    |                                                                                                                                                                                                                                                                                                                                                                  |  |
| <b>Disease targeted by the SIAs</b>        |                                                                                                                                                                                                                                                                                                                                                                  |  |
| <b>Outcome measures</b>                    | <input type="checkbox"/> Yes<br>Vaccination coverage attained by the SIAs<br><br><input type="checkbox"/> Yes<br>Disease outbreaks<br><br><input type="checkbox"/> Yes<br>Disease incidence<br><br><input type="checkbox"/> Yes<br>Routine immunization coverage after SIAs)<br><br><input type="checkbox"/> Other (specify):<br><br><input type="checkbox"/> No |  |
| <b>Final decision on study eligibility</b> | <input type="checkbox"/> Yes (Include) <input type="checkbox"/> No (Exclude)                                                                                                                                                                                                                                                                                     |  |
| <b>Reason(s) for exclusion</b>             |                                                                                                                                                                                                                                                                                                                                                                  |  |

**NB: Do not proceed to the next step if the study is excluded from the review**

**4) Study aims and methods**

|                                                       | Describe as stated in report/paper/book chapter | Reference page/table or figure in the study |
|-------------------------------------------------------|-------------------------------------------------|---------------------------------------------|
| <b>Aim(s)</b>                                         |                                                 |                                             |
| <b>Methods to estimate target population for SIAs</b> |                                                 |                                             |

|                                                                                                    |                                                                                                                                                                                                       |                                                                                                                                                                                                                                                                                                                              |  |
|----------------------------------------------------------------------------------------------------|-------------------------------------------------------------------------------------------------------------------------------------------------------------------------------------------------------|------------------------------------------------------------------------------------------------------------------------------------------------------------------------------------------------------------------------------------------------------------------------------------------------------------------------------|--|
| 1<br>2<br>3<br>4<br>5<br>6                                                                         | <b>Methods to estimate SIAs coverage</b>                                                                                                                                                              |                                                                                                                                                                                                                                                                                                                              |  |
| 7<br>8<br>9<br>10<br>11                                                                            | <b>Period between SIAs and coverage survey (if applicable)</b>                                                                                                                                        |                                                                                                                                                                                                                                                                                                                              |  |
| 12<br>13                                                                                           | <b>SIAs start date</b>                                                                                                                                                                                |                                                                                                                                                                                                                                                                                                                              |  |
| 14<br>15<br>16<br>17<br>18<br>19<br>20<br>21<br>22<br>23                                           | <b>SIAs end date</b><br><br><i>(NB: If SIAs were conducted in more than one phase, duplicate the two rows as appropriate).</i>                                                                        |                                                                                                                                                                                                                                                                                                                              |  |
| 24<br>25<br>26<br>27<br>28<br>29<br>30<br>31<br>32                                                 | <b>Total duration of the SIAs (in days)</b><br><br><i>(NB: If SIAs were conducted in more than one phase, duplicate this row as appropriate).</i>                                                     |                                                                                                                                                                                                                                                                                                                              |  |
| 33<br>34<br>35<br>36<br>37<br>38<br>39<br>40<br>41<br>42<br>43<br>44<br>45<br>46<br>47<br>48<br>49 | <b>Means of communicating the information about the SIAs to the target population (phase 1)</b><br><br><i>(NB: If SIAs were conducted in more than one phase, duplicate this row as appropriate).</i> | <input type="checkbox"/> Healthcare facility<br><br><input type="checkbox"/> Door to door<br><br><input type="checkbox"/> Word of mouth<br><br><input type="checkbox"/> Mass media (radio, TV etc)<br><br><input type="checkbox"/> Digital media (text message, emails etc)<br><br><input type="checkbox"/> Other (specify): |  |
| 50<br>51<br>52<br>53<br>54<br>55<br>56<br>57<br>58<br>59<br>60                                     | <b>Potential interference of SIA with routine immunization services investigated</b>                                                                                                                  | <input type="checkbox"/> Yes (explain):<br><br><input type="checkbox"/> No                                                                                                                                                                                                                                                   |  |



|                                                                                             |                                                                                                                                                                           |  |
|---------------------------------------------------------------------------------------------|---------------------------------------------------------------------------------------------------------------------------------------------------------------------------|--|
| <p><b>Personnel performing the vaccinations during the SIAs</b></p>                         | <p><input type="checkbox"/> Doctors</p> <p><input type="checkbox"/> Nurses</p> <p><input type="checkbox"/> Volunteers</p> <p><input type="checkbox"/> Other (specify)</p> |  |
| <p><b>Number of personnel performing the vaccinations during the SIAs (if provided)</b></p> |                                                                                                                                                                           |  |
| <p>Notes:</p>                                                                               |                                                                                                                                                                           |  |

**5) Participants**

| Characteristics                                                                                 | Description                                                                                                                                                                                                                   | Reference page/table or figure in the study |
|-------------------------------------------------------------------------------------------------|-------------------------------------------------------------------------------------------------------------------------------------------------------------------------------------------------------------------------------|---------------------------------------------|
| <p><b>SIA setting</b></p>                                                                       | <p><input type="checkbox"/> Rural community      <input type="checkbox"/> Urban      <input type="checkbox"/> Displaced</p> <p><input type="checkbox"/> Other (specify)</p>                                                   |                                             |
| <p><b>Socio-economic status of the target population relative to the general population</b></p> | <p><input type="checkbox"/> Low (L) (AA)      <input type="checkbox"/> Average (A)      <input type="checkbox"/> Above average</p> <p><input type="checkbox"/> All (L, A &amp;AA)      <input type="checkbox"/> Not clear</p> |                                             |
| <p><b>Methods used to classify the socio-economic status of the SIAs target population</b></p>  |                                                                                                                                                                                                                               |                                             |

|                                                                     |                                                                                             |  |
|---------------------------------------------------------------------|---------------------------------------------------------------------------------------------|--|
| Total number of participants enrolled for the SIAs                  |                                                                                             |  |
| Age                                                                 |                                                                                             |  |
| Gender                                                              | <input type="checkbox"/> Female <input type="checkbox"/> Male <input type="checkbox"/> Both |  |
| Notes (provide any other relevant information on the participants): |                                                                                             |  |

### 6) Outcome measures

| Details of the outcome                                                                                                                      | Characteristics of the outcomes |   |   |       |     | Reference page/table or figure in the study |
|---------------------------------------------------------------------------------------------------------------------------------------------|---------------------------------|---|---|-------|-----|---------------------------------------------|
|                                                                                                                                             |                                 | F | M | Total | Age |                                             |
| Participants vaccinated during the SIAs period<br><br><i>(NB: If SIAs were conducted in more than one phase, duplicate as appropriate).</i> | Targeted                        |   |   |       |     |                                             |
|                                                                                                                                             | Vaccinated                      |   |   |       |     |                                             |
|                                                                                                                                             | Coverage attained               |   |   |       |     |                                             |
| Routine immunization                                                                                                                        | Before:                         |   |   |       |     |                                             |

1  
2  
3  
4  
5  
6  
7  
8  
9  
10  
11  
12  
13  
14  
15  
16  
17  
18  
19  
20  
21  
22  
23  
24  
25  
26  
27  
28  
29  
30  
31  
32  
33  
34  
35  
36  
37  
38  
39  
40  
41  
42  
43  
44  
45  
46  
47  
48  
49  
50  
51  
52  
53  
54  
55  
56  
57  
58  
59  
60

|                                                                                                                                                         |                |  |
|---------------------------------------------------------------------------------------------------------------------------------------------------------|----------------|--|
| <p><b>coverage before and after SIAs (NB: If SIAs were conducted in more than one phase, duplicate this row as appropriate).</b></p>                    | <p>After:</p>  |  |
| <p><b>Incidence of target disease before and after SIAs (NB: If SIAs were conducted in more than one phase, duplicate this row as appropriate).</b></p> | <p>Before:</p> |  |
|                                                                                                                                                         | <p>After:</p>  |  |
| <p><b>Percentage reduction or increase in the routine immunization coverage (NB: specify increase or decrease)</b></p>                                  |                |  |
| <p><b>Notes:</b></p>                                                                                                                                    |                |  |

**7) Risk of bias assessment**

| Type of bias                                   | Tick appropriately and describe below after the tick.                                               | Reference page/table or figure in the study |
|------------------------------------------------|-----------------------------------------------------------------------------------------------------|---------------------------------------------|
| <p><b>Is there selection bias? (Assess</b></p> | <p><input type="checkbox"/>Yes    <input type="checkbox"/>No    <input type="checkbox"/>Unclear</p> |                                             |

|                                                                                                                                                                                                                           |                                                                                           |  |
|---------------------------------------------------------------------------------------------------------------------------------------------------------------------------------------------------------------------------|-------------------------------------------------------------------------------------------|--|
| <p><b>comparability of groups at baseline, confounding and adjustment. For RCTs assess sequence generation and allocation concealment).</b></p>                                                                           |                                                                                           |  |
| <p><b>Is there performance bias? (Assess fidelity of the interventions, and quality of the information regarding who received which interventions, including blinding of study subjects and healthcare providers)</b></p> | <input type="checkbox"/> Yes <input type="checkbox"/> No <input type="checkbox"/> Unclear |  |
| <p><b>Is there detection bias? (Assess whether there was biased and correct appraisal of outcomes, including blinding of assessors)</b></p>                                                                               | <input type="checkbox"/> Yes <input type="checkbox"/> No <input type="checkbox"/> Unclear |  |
| <p><b>Is there attrition bias? (Assess the completeness of sample, follow-up and outcome data, reasons for loss to follow up explained)</b></p>                                                                           | <input type="checkbox"/> Yes <input type="checkbox"/> No <input type="checkbox"/> Unclear |  |
| <p><b>Is there reporting bias (Assess selective reporting of results)</b></p>                                                                                                                                             | <input type="checkbox"/> Yes <input type="checkbox"/> No <input type="checkbox"/> Unclear |  |
| <p><b>Other biases (specify)</b></p>                                                                                                                                                                                      | <input type="checkbox"/> Yes <input type="checkbox"/> No <input type="checkbox"/> Unclear |  |

### 8) Other relevant information

|                                                | <b>Descriptions/figures as stated in report/paper/book chapter</b> | <b>Reference page/table or figure in the study</b> |
|------------------------------------------------|--------------------------------------------------------------------|----------------------------------------------------|
| <p><b>Key conclusions from the authors</b></p> |                                                                    |                                                    |

1  
2  
3  
4  
5  
6  
7  
8  
9  
10  
11  
12  
13  
14  
15  
16  
17  
18  
19  
20  
21  
22  
23  
24  
25  
26  
27  
28  
29  
30  
31  
32  
33  
34  
35  
36  
37  
38  
39  
40  
41  
42  
43  
44  
45  
46  
47  
48  
49  
50  
51  
52  
53  
54  
55  
56  
57  
58  
59  
60

|       |  |  |
|-------|--|--|
| Notes |  |  |
|-------|--|--|

For peer review only
